# Supplementary material for: Catalytic resonance theory: the catalytic mechanics of programmable ratchets
Source: Royal Society of Chemistry journal article supplement (doi:10.1039/d4sc04069d), 2024-01-01
Supplement: d4sc04069d1.pdf [file d4sc04069d1.pdf]

## SUPPORTING INFORMATION

### **Catalytic Resonance Theory: The Catalytic Mechanics of Programmable Ratchets**

Madeline A. Murphy<sup>1,2</sup>, Sallye R. Gathmann<sup>1,2</sup>, Rachel Getman<sup>1,3</sup>,  
Lars Grabow<sup>1,4</sup>, Omar A. Abdelrahman<sup>1,4</sup>, Paul J. Dauenhauer<sup>1,2\*</sup>

<sup>1</sup> Center for Programmable Energy Catalysis, University of Minnesota, 421 Washington Ave. SE, Minneapolis, MN, 55455, USA

<sup>2</sup> Department of Chemical Engineering & Materials Science, University of Minnesota, 421 Washington Ave. SE, Minneapolis, MN, 55455, USA

<sup>3</sup> William G. Lowrie Department of Chemical and Biomolecular Engineering, The Ohio State University, Columbus, OH 43210

<sup>4</sup> William A. Brookshire Department of Chemical and Biomolecular Engineering, University of Houston, S222 Cullen College of Engineering Bldg 1, 4226 Martin Luther King Boulevard, Houston, TX 77204

\* Corresponding author: hauer@umn.edu

#### Table of Contents

|                                                                  |    |
|------------------------------------------------------------------|----|
| <i>Elementary Ratchet Average Surface Coverage – Derivation.</i> | S2 |
| <i>High Frequency Surface Coverage – Derivation</i>              | S3 |
| <i>Frequency Response Model Fitting.</i>                         | S4 |
| <i>Figure Data Sets</i>                                          | S7 |

(1) *Elementary Ratchet Average Surface Coverage – Derivation.* The average surface coverage of an elementary reaction step ratchet ( $A^* \leftrightarrow B^*$ , blue and green states) was determined as follows. The rate of change of molecules on the surface was described with the forward and reverse rate constants of first order reactions for a single catalyst state.

$$\frac{d\theta_A}{dt} = -k_1\theta_A + k_{-1}\theta_B \quad (\text{S1})$$

The rate equation was rewritten as follows,

$$\frac{d\theta_A}{k_{-1} - \theta_A(k_1 + k_{-1})} = dt \quad (\text{S2})$$

Using the initial condition that  $\theta_A(t) = \theta_A^\circ$  for  $t = 0$ , the surface coverage of  $A^*$  was determined for a single catalyst state (blue or green) at any time  $t$ , initial surface coverage of  $A^*$ , and kinetic rate constants,

$$\theta_A = \frac{k_{-1} - [k_{-1} - \theta_A^\circ(k_1 + k_{-1})]e^{-(k_1 + k_{-1})t}}{(k_1 + k_{-1})} \quad (\text{S3})$$

The surface coverage of species  $A^*$  at equilibrium for either catalyst state (blue or green) was calculated using the kinetic rate constants.

$$\theta_{A,state}^{EQ} = \frac{k_{-1}}{(k_1 + k_{-1})} \quad (\text{S4})$$

$$\theta_A = \frac{k_{-1}}{(k_1 + k_{-1})} - \frac{k_{-1}e^{-(k_1 + k_{-1})t}}{(k_1 + k_{-1})} + \frac{\theta_A^\circ(k_1 + k_{-1})e^{-(k_1 + k_{-1})t}}{(k_1 + k_{-1})} \quad (\text{S5})$$

$$\theta_A = \theta_{A,state}^{EQ} - \theta_{A,state}^{EQ} e^{-(k_1 + k_{-1})t} + \theta_A^\circ e^{-(k_1 + k_{-1})t} \quad (\text{S6})$$

$$\theta_A = \theta_{A,state}^{EQ} + [\theta_A^\circ - \theta_{A,state}^{EQ}]e^{-(k_1 + k_{-1})t} \quad (\text{S7})$$

Alternatively can also be written as:

$$\theta_A = \theta_{A,state}^{EQ} + [\theta_A^\circ - \theta_{A,state}^{EQ}]e^{-\frac{k_{-1}}{\theta_{A,state}^{EQ}}t} \quad (\text{S8})$$

The overall ratchet equilibrium was calculated for a catalyst oscillation period ( $\tau_{\text{blue}} + \tau_{\text{green}}$ ) by determining the equilibrium concentration of surface species weighted by the time in each catalyst state ( $\tau_{\text{blue}}$  or  $\tau_{\text{green}}$  for blue or green),

$$\theta_A^{EQ} = \left( \frac{\tau_{\text{green}}}{\tau_{\text{blue}} + \tau_{\text{green}}} \right) \theta_{A,\text{green}}^{EQ} + \left( \frac{\tau_{\text{blue}}}{\tau_{\text{blue}} + \tau_{\text{green}}} \right) \theta_{A,\text{blue}}^{EQ} \quad (\text{S9})$$

The average surface coverage of A\* in each state was calculated by integrating the surface coverage over the timescale of that state period ( $\tau_{\text{blue}} + \tau_{\text{green}}$ ) and then dividing by the time scale ( $\tau_{\text{blue}}$  or  $\tau_{\text{green}}$ ).

$$\bar{\theta}_{A,\text{state}} = \left( \frac{1}{\tau_{\text{state}}} \right) \int_0^{\tau_{\text{state}}} \frac{k_{-1} - [k_{-1} - \theta_A^o(k_1 + k_{-1})]e^{-(k_1 + k_{-1})t}}{(k_1 + k_{-1})} dt \quad (\text{S10})$$

with the analytical solution that is equation 4 in the main paper of:

$$\bar{\theta}_{A,\text{state}} = \frac{k_{-1}}{k_1 + k_{-1}} - \frac{1}{\tau_{\text{state}}} \left( \frac{k_{-1} - \theta_A^o(k_1 + k_{-1})}{(k_1 + k_{-1})^2} (1 - e^{-(k_1 + k_{-1})\tau_{\text{state}}}) \right) \quad (\text{S11})$$

This can be further rewritten as follows

$$\bar{\theta}_{A,\text{state}} = \frac{k_{-1}}{(k_1 + k_{-1})} - \frac{1}{(k_1 + k_{-1})\tau_{\text{state}}} \left( \frac{k_{-1}}{(k_1 + k_{-1})} (1 - e^{-(k_1 + k_{-1})\tau_{\text{state}}}) - \theta_A^o (1 - e^{-(k_1 + k_{-1})\tau_{\text{state}}}) \right) \quad (\text{S12})$$

$$\bar{\theta}_{A,\text{state}} = \theta_{A,\text{state}}^{EQ} - \frac{1}{(k_1 + k_{-1})\tau_{\text{state}}} \left( \theta_{A,\text{state}}^{EQ} (1 - e^{-(k_1 + k_{-1})\tau_{\text{state}}}) - \theta_A^o (1 - e^{-(k_1 + k_{-1})\tau_{\text{state}}}) \right) \quad (\text{S13})$$

$$\bar{\theta}_{A,\text{state}} = \theta_{A,\text{state}}^{EQ} - \frac{1 - e^{-(k_1 + k_{-1})\tau_{\text{state}}}}{(k_1 + k_{-1})\tau_{\text{state}}} (\theta_{A,\text{state}}^{EQ} - \theta_A^o) \quad (\text{S14})$$

$$\bar{\theta}_{A,\text{state}} - \theta_{A,\text{state}}^{EQ} = \frac{1 - e^{-(k_1 + k_{-1})\tau_{\text{state}}}}{(k_1 + k_{-1})\tau_{\text{state}}} (\theta_A^o - \theta_{A,\text{state}}^{EQ}) \quad (\text{S15})$$

$$\frac{\bar{\theta}_{A,\text{state}} - \theta_{A,\text{state}}^{EQ}}{\theta_A^o - \theta_{A,\text{state}}^{EQ}} = \frac{1 - e^{-(k_1 + k_{-1})\tau_{\text{state}}}}{(k_1 + k_{-1})\tau_{\text{state}}} \quad (\text{S16})$$

(2) *High Frequency Surface Coverage – Derivation.* Elementary catalytic ratchets operating at high frequency ( $hf$ ) defined as applied frequencies far above the cutoff frequency ( $f \gg f_c$ ) were shown to approach a constant surface coverage value,  $\bar{\theta}_{i,hf}$ . This surface coverage for species, I, can be calculated from a derived quantity starting from the rate of conversion of C\* to D\*.

$$\frac{d\theta_C}{dt} = -k_1\theta_C + k_{-1}\theta_D = k_{-1} - \theta_C(k_1 + k_{-1}) \quad (\text{S17})$$

At high frequency at steady state, the rates of surface coverage change in each of the catalyst states (blue and green) weighted by the time of reaction in state  $i$ ,  $\tau_i$ , will be equal.

$$\tau_{blue} \left. \frac{d\theta_C}{dt} \right|_{blue} = -\tau_{green} \left. \frac{d\theta_C}{dt} \right|_{green} \quad (\text{S18})$$

The duty cycle was defined in the main text as,

$$D_B = \frac{\tau_{blue}}{\tau_{green} + \tau_{blue}}; (1 - D_B) = D_G = \frac{\tau_{green}}{\tau_{green} + \tau_{blue}} \quad (\text{S19})$$

The time of reaction in state  $i$  is then represented as,

$$\tau_i = D_i\tau; \tau_B = D_B\tau \quad (\text{S20})$$

Where  $\tau$  is the time of an entire oscillation period and is equal to  $\tau_{blue} + \tau_{green}$ . In the following derivation, the blue state is represented as ‘B’ and the green state is represented as ‘G’ for brevity. Equation S8 can then be written out yielding the following equation where the entire oscillation period,  $\tau$ , cancels from both sides,

$$D_B\tau (k_{-1,B} - \theta_C(k_{1,B} + k_{-1,B})) = -(1 - D_B)\tau (k_{-1,G} - \theta_C(k_{1,G} + k_{-1,G})) \quad (\text{S21})$$

Solving for  $\theta_C$  yields,

$$\bar{\theta}_{C,hf} = \frac{(D_B k_{-1,b} + (1-D_B)k_{-1,g})}{(D_B k_{-1,b} + (1-D_B)k_{-1,g}) + (D_B k_{1,b} + (1-D_B)k_{1,g})} = \frac{1}{1+\lambda} \quad (\text{S22})$$

Where  $\lambda$  is derived here in equation S12 and was defined in the main paper as,

$$\lambda = \frac{(k_{1,blue}D_B + k_{1,green}(1-D_B))}{(k_{-1,blue}D_B + k_{-1,green}(1-D_B))} \quad (\text{S23})$$

The ratchet directionality metric can also be written by substitution using equation S9 as,

$$\lambda = \frac{k_{1,blue}\tau_{blue} + k_{1,green}\tau_{green}}{k_{-1,blue}\tau_{blue} + k_{-1,green}\tau_{green}} = \frac{\sum_j \tau_j k_{1,j}}{\sum_j \tau_j k_{-1,j}} \quad (\text{S24})$$

(3) Frequency Response Model Fitting.

**Table S0. Frequency Response Surface Coverage Model Equations.**

| Model Name              | Model Form                                                                                                                                                       |
|-------------------------|------------------------------------------------------------------------------------------------------------------------------------------------------------------|
| <b>Model 1 (Eq. 13)</b> | $\bar{\theta}_{C,Avg} = \bar{\theta}_{C,eq} + \left( \frac{1}{(1 + k_{II}\tau_{II}/4)^2} \right) \left( \frac{1}{1 + \lambda} - \bar{\theta}_{C,eq} \right)$     |
| <b>Model 2</b>          | $\bar{\theta}_{C,Avg} = \bar{\theta}_{C,eq} + \left( \frac{1}{1 + \frac{k_{II}\tau_{II}}{2}} \right) \left( \frac{1}{1 + \lambda} - \bar{\theta}_{C,eq} \right)$ |
| <b>Model 3</b>          | $\bar{\theta}_{C,Avg} = \bar{\theta}_{C,eq} + \left( \frac{1}{(1 + k_{II}\tau_{II})^{0.5}} \right) \left( \frac{1}{1 + \lambda} - \bar{\theta}_{C,eq} \right)$   |
| <b>Model 4</b>          | $\bar{\theta}_{C,Avg} = \bar{\theta}_{C,eq} + \left( \frac{1}{(1 + k_{II}\tau_{II}/6)^3} \right) \left( \frac{1}{1 + \lambda} - \bar{\theta}_{C,eq} \right)$     |

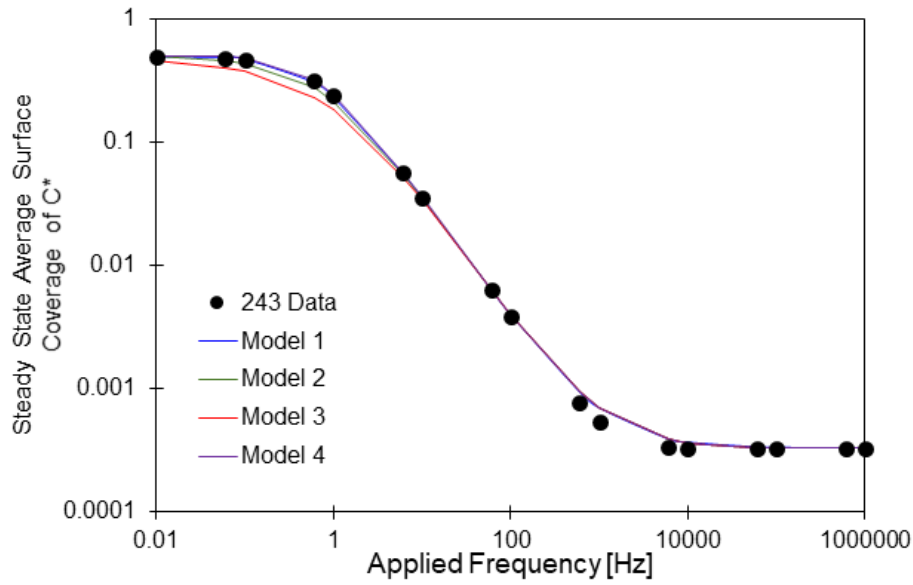

| Model Name | Sum of Squares |
|------------|----------------|
| Model 1    | 0.00031        |
| Model 2    | 0.00313        |
| Model 3    | 0.02610        |
| Model 4    | 0.00082        |

**Figure S1.** Four Models of Steady State Surface Coverage of C\* described in Table S0 with the sum of squares error between the data at 243 K and the different models. Simulation data of the following catalytic ratchet system:  $\alpha = 0.78$ ,  $\beta = 0.67$  eV,  $\gamma_{D/C} = 2.0$ ,  $\delta_{C-D} = 0.3$ ,  $\Delta BE_C = 0.6$  eV

Unique Programmable Elementary Catalytic Ratchets – Simulations of Figure 5.

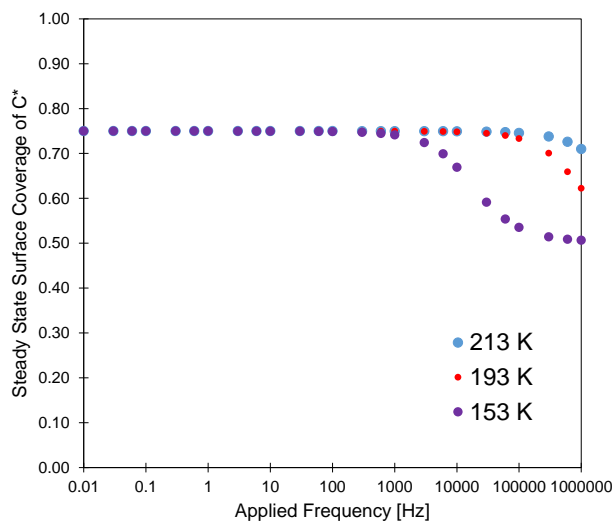

**Figure S2.** Simulation of the catalytic ratchet in **Figure 5a** with nonviable scaling in the main paper at 213 K (blue), 193 K (red), and 153 K (purple) at varying applied frequency indicates that the selected reaction system behaves as a forward (favors D\*) ratchet, which is not consistent with its  $\lambda$  values less than unity (0.978, 0.953, and 0.938 at 153 K, 193 K, and 213 K, respectively).

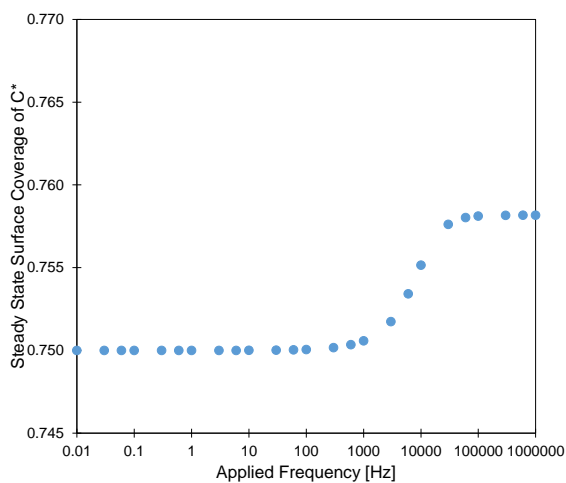

**Figure S3.** Simulation of the catalytic ratchet in **Figure 5b** with viable scaling in the main paper at 153 K (blue) at varying applied frequency indicates that the selected reaction system behaves as a reverse ratchet (favors C\*) ratchet, which is consistent with its  $\lambda$  values less than unity (0.319).

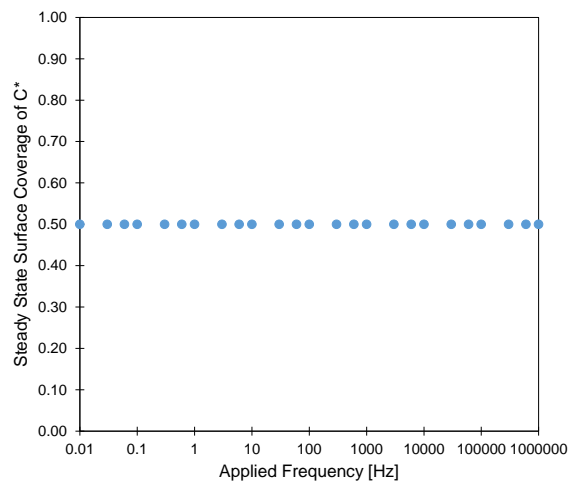

**Figure S4.** Simulation of the catalytic ratchet in **Figure 5c** in the main paper at 213 K at varying applied frequency indicates that the selected reaction system does not behave as a ratchet, consistent with its  $\lambda$  of unity.

(4) Figure Data Sets

**Table S1.** Simulation data for oscillation of the elementary step between C\* and D\* exhibits a steady state average surface coverage of C\* ( $\theta_C$ ) that varies with temperature and applied oscillation frequency ( $10^{-2} < f < 10^6$ ). ( $\alpha = 0.78$ ,  $\beta = 0.67$  eV,  $\gamma_{D/C} = 2.0$ ,  $\delta_{C-D} = 0.3$ ,  $\Delta BE_C = 0.6$  eV) This data is presented as Figure 2d in the main paper.

| Frequency (1/s) | 193      | 203      | 213      | 223      | 233         | 243      | 253      | 263      | 273      | 283      | 293      | 303      | 313      | 323      | 333      | 343      | 353      | 363      | 373      | 383      | 393      |
|-----------------|----------|----------|----------|----------|-------------|----------|----------|----------|----------|----------|----------|----------|----------|----------|----------|----------|----------|----------|----------|----------|----------|
| 0.01            | 0.020485 | 0.107231 | 0.319166 | 0.455158 | 0.4883655   | 0.496627 | 0.498922 | 0.499624 | 0.499858 | 0.499943 | 0.499975 | 0.499989 | 0.499995 | 0.499997 | 0.499999 | 0.499999 | 0.5      | 0.5      | 0.5      | 0.5      | 0.5      |
| 0.06            | 0.003511 | 0.020446 | 0.092666 | 0.27291  | 0.4302473   | 0.479762 | 0.49353  | 0.497744 | 0.49915  | 0.499657 | 0.499853 | 0.499933 | 0.499968 | 0.499984 | 0.499992 | 0.499996 | 0.499997 | 0.499999 | 0.499999 | 0.499999 | 0.499999 |
| 0.1             | 0.002119 | 0.012418 | 0.058674 | 0.198644 | 0.3852392   | 0.46627  | 0.489216 | 0.49624  | 0.498584 | 0.499429 | 0.499755 | 0.499889 | 0.499947 | 0.499973 | 0.499986 | 0.499993 | 0.499996 | 0.499998 | 0.499999 | 0.499999 | 0.499999 |
| 0.6             | 0.000371 | 0.002127 | 0.010522 | 0.043776 | 0.1430472   | 0.314742 | 0.435325 | 0.47744  | 0.491503 | 0.496572 | 0.498528 | 0.499332 | 0.499681 | 0.499841 | 0.499917 | 0.499955 | 0.499975 | 0.499985 | 0.499991 | 0.499995 | 0.499997 |
| 1               | 0.000231 | 0.001291 | 0.00637  | 0.026939 | 0.0936451   | 0.239339 | 0.393208 | 0.4624   | 0.485839 | 0.494286 | 0.497547 | 0.498887 | 0.499469 | 0.499734 | 0.499862 | 0.499925 | 0.499958 | 0.499976 | 0.499986 | 0.499991 | 0.499994 |
| 6               | 5.79E-05 | 0.000244 | 0.001113 | 0.004696 | 0.0175949   | 0.057106 | 0.15183  | 0.299027 | 0.415272 | 0.465716 | 0.485283 | 0.49332  | 0.496811 | 0.498407 | 0.49917  | 0.499551 | 0.499748 | 0.499855 | 0.499913 | 0.499947 | 0.499967 |
| 10              | 4.77E-05 | 0.00016  | 0.000689 | 0.002856 | 0.0107032   | 0.035436 | 0.100039 | 0.223546 | 0.362549 | 0.442868 | 0.475471 | 0.488867 | 0.494686 | 0.497345 | 0.498617 | 0.499252 | 0.499581 | 0.499758 | 0.499856 | 0.499912 | 0.499945 |
| 60              | 4.12E-05 | 7.17E-05 | 0.000163 | 0.000544 | 0.0019020   | 0.006286 | 0.01904  | 0.051775 | 0.122273 | 0.237024 | 0.357773 | 0.433238 | 0.468113 | 0.484067 | 0.491701 | 0.49551  | 0.497485 | 0.498546 | 0.499134 | 0.49947  | 0.499668 |
| 100             | 4.11E-05 | 6.9E-05  | 0.00013  | 0.000359 | 0.0011888   | 0.00385  | 0.01163  | 0.032085 | 0.079018 | 0.166997 | 0.286741 | 0.389924 | 0.44686  | 0.473445 | 0.486168 | 0.492516 | 0.495808 | 0.497576 | 0.498557 | 0.499117 | 0.499446 |
| 600             | 4.1E-05  | 6.75E-05 | 0.000107 | 0.000168 | 0.0003125   | 0.000782 | 0.002151 | 0.005797 | 0.014803 | 0.035194 | 0.076543 | 0.148398 | 0.24781  | 0.347633 | 0.417212 | 0.4551   | 0.47485  | 0.485457 | 0.491341 | 0.494703 | 0.496679 |
| 1000            | 4.1E-05  | 6.75E-05 | 0.000106 | 0.000163 | 0.0002638   | 0.000543 | 0.001382 | 0.003609 | 0.009109 | 0.021722 | 0.048198 | 0.097716 | 0.17637  | 0.27504  | 0.365443 | 0.425261 | 0.458083 | 0.475761 | 0.485568 | 0.491172 | 0.494464 |
| 6000            | 4.1E-05  | 6.74E-05 | 0.000106 | 0.00016  | 0.0002333   | 0.000336 | 0.000503 | 0.000885 | 0.001866 | 0.004135 | 0.009027 | 0.019008 | 0.038085 | 0.071742 | 0.125227 | 0.199011 | 0.283224 | 0.359319 | 0.413686 | 0.447038 | 0.466785 |
| 10000           | 4.1E-05  | 6.74E-05 | 0.000106 | 0.00016  | 0.0002328   | 0.000331 | 0.00047  | 0.000717 | 0.001299 | 0.002691 | 0.005699 | 0.011838 | 0.023711 | 0.045259 | 0.081416 | 0.136193 | 0.208611 | 0.288726 | 0.360284 | 0.41204  | 0.444649 |
| 60000           | 4.1E-05  | 6.84E-05 | 0.000106 | 0.00016  | 0.0002324   | 0.000328 | 0.000451 | 0.000608 | 0.000811 | 0.001106 | 0.001628 | 0.002709 | 0.004887 | 0.008942 | 0.01614  | 0.028389 | 0.048244 | 0.07859  | 0.121719 | 0.177657 | 0.242381 |
| 100000          | 4.1E-05  | 6.84E-05 | 0.000106 | 0.00016  | 0.0002324   | 0.000328 | 0.000451 | 0.000606 | 0.0008   | 0.001053 | 0.001422 | 0.002075 | 0.003375 | 0.005875 | 0.010339 | 0.017964 | 0.030487 | 0.050148 | 0.079383 | 0.120073 | 0.172248 |
| 600000          | 4.1E-05  | 6.84E-05 | 0.000106 | 0.00016  | 0.0002324   | 0.000328 | 0.000451 | 0.000604 | 0.000794 | 0.001023 | 0.001297 | 0.001627 | 0.002033 | 0.00257  | 0.003372 | 0.00471  | 0.007013 | 0.010819 | 0.016779 | 0.025777 | 0.03895  |
| 1000000         | 4.1E-05  | 6.84E-05 | 0.000106 | 0.00016  | 0.0002324   | 0.000328 | 0.000451 | 0.000604 | 0.000794 | 0.001022 | 0.001295 | 0.001617 | 0.002    | 0.002466 | 0.003069 | 0.003933 | 0.005308 | 0.007588 | 0.011267 | 0.016913 | 0.025245 |
| k1,blue         | 2.46E-11 | 3.59E-10 | 4.06E-09 | 3.69E-08 | 2.78286E-07 | 1.78E-06 | 9.78E-06 | 4.73E-05 | 0.000204 | 0.000793 | 0.002812 | 0.009168 | 0.027714 | 0.078234 | 0.207499 | 0.519921 | 1.236678 | 2.804412 | 6.086405 | 12.68548 | 25.46958 |
| k-1,blue        | 0.001683 | 0.010075 | 0.05097  | 0.222966 | 0.859313416 | 2.963745 | 9.268831 | 26.57985 | 70.56049 | 174.8257 | 407.1477 | 896.7356 | 1877.87  | 3756.561 | 7208.249 | 13315.74 | 23757.45 | 41056.42 | 68900.66 | 112544.6 | 179300.3 |
| k2,green        | 41.07875 | 149.4593 | 481.6829 | 1397.712 | 3701.357918 | 9046.787 | 20603.7  | 44077.14 | 89183.85 | 171683.4 | 316049.2 | 558840.1 | 952804.1 | 1571708  | 2515852  | 3918185  | 5950918  | 8832487  | 12834720 | 18290031 | 25598474 |
| k-2,green       | 6.01E-07 | 5.32E-06 | 3.83E-05 | 0.000232 | 0.001198675 | 0.005419 | 0.021742 | 0.078491 | 0.257924 | 0.779205 | 2.182908 | 5.713327 | 14.06186 | 32.7323  | 72.42226 | 152.9879 | 309.771  | 603.3145 | 1133.767 | 2061.564 | 3636.26  |



**Table S2-A.** Kinetic Data of Elementary Ratchets for the Ratchet Directionality Metric,  $\lambda > 1$  (Figure 4 in the main paper).

| Dataset | k1,blue     | k-1, blue   | k2,green    | k-2,green   | (k1g + k1b)*0.5 | (k-1g + k-1b)*0.5 | $\lambda$   |
|---------|-------------|-------------|-------------|-------------|-----------------|-------------------|-------------|
| 1       | 2.77E-02    | 1.88E+03    | 9.53E+05    | 1.41E+01    | 476402.0643     | 945.9660133       | 504         |
| 2       | 1.66E+04    | 5.10E+02    | 2.84E-01    | 1.73E+03    | 8319.021567     | 1118.373047       | 7           |
| 3       | 1.21E+07    | 1.47E+01    | 6.68E+02    | 1.02E+04    | 6069402.76      | 5099.281524       | 1190        |
| 4       | 6.22E+07    | 4.95E+00    | 3.42E+03    | 3.42E+03    | 31120582.06     | 1714.909293       | 18147       |
| 5       | 1.27E-02    | 2.04E+04    | 1.13E+05    | 3.73E+02    | 56710.79038     | 10391.07252       | 5           |
| 6       | 1.22E-24    | 3.03E+04    | 2.37E+06    | 8.11E-04    | 1183641.835     | 15140.80534       | 78          |
| 7       | 1.80E+10    | 7.88E-02    | 1.38E-02    | 8.42E+01    | 8995318768      | 42.16079428       | 213357431   |
| 8       | 2.75E+03    | 3.98E+00    | 3.52E+01    | 1.18E+01    | 1394.696993     | 7.916365723       | 176         |
| 9       | 2.99E+02    | 2.10E+04    | 5.10E+05    | 8.67E+02    | 254964.5455     | 10941.48812       | 23          |
| 10      | 1.12E+03    | 1.63E+05    | 1.97E+06    | 1.12E+03    | 984544.3444     | 82101.37564       | 12          |
| 11      | 4.16E-03    | 9.66E-01    | 3.77E+00    | 1.06E-03    | 1.888719802     | 0.483707409       | 4           |
| 12      | 1.21E-03    | 2.79E+06    | 1.02E+08    | 5.82E+01    | 50755312.99     | 1396450.032       | 36          |
| 13      | 0.016232303 | 4.58006E-06 | 1.78837E-05 | 0.004157147 | 0.008125093     | 0.002080863       | 4           |
| 14      | 2.45512E-12 | 387.3536188 | 582.8852371 | 9.791036568 | 291.4426185     | 198.5723277       | 1           |
| 15      | 19425.22858 | 0.011635111 | 10.50759777 | 1.752584586 | 9717.86809      | 0.882109848       | 11017       |
| 16      | 19425.22858 | 0.011635111 | 0.0006626   | 1106.234032 | 9712.614623     | 553.1228335       | 18          |
| 17      | 1151.795701 | 9.16976E-05 | 3.48782E-06 | 43.80986819 | 575.8978522     | 21.90497994       | 26          |
| 18      | 43.80986819 | 0.000810762 | 9.16976E-05 | 4.954915761 | 21.90497994     | 2.477863262       | 9           |
| 19      | 598.983352  | 0.006428394 | 0.017141291 | 0.087891178 | 299.5002466     | 0.047159786       | 6351        |
| 20      | 127129.7629 | 0.041170622 | 49.79386519 | 600.8773128 | 63589.77837     | 300.4592417       | 212         |
| 21      | 26015340438 | 4.41685E-05 | 28920520.19 | 28920520.19 | 13022130479     | 14460260.09       | 901         |
| 22      | 1209668831  | 0.000105898 | 7236.942879 | 17.70106806 | 604838034.1     | 8.850586977       | 68338748    |
| 23      | 59825819.2  | 0.002141243 | 3966.428021 | 32.2964687  | 29914892.81     | 16.14930497       | 1852395     |
| 24      | 24459317079 | 5.23733E-06 | 13204.15799 | 9.701612063 | 12229665142     | 4.85080865        | 2521160084  |
| 25      | 355858.3571 | 3.85001081  | 3672.409322 | 373.0680328 | 179765.3832     | 188.4590218       | 954         |
| 26      | 58406222.52 | 5503.746735 | 88797.07172 | 88797.07172 | 29247509.8      | 47150.40923       | 620         |
| 27      | 147583969.3 | 13907.16184 | 88797.07172 | 88797.07172 | 73836383.17     | 51352.11678       | 1438        |
| 28      | 28920520.19 | 1.191646845 | 5870.523539 | 5870.523539 | 14463195.36     | 2935.857593       | 4926        |
| 29      | 158384235.8 | 6.526095438 | 5870.523539 | 5870.523539 | 79195053.18     | 2938.524817       | 26951       |
| 30      | 1277038871  | 2.840039475 | 152.7215505 | 152.7215505 | 638519512.1     | 77.78079499       | 8209218     |
| 31      | 199158932   | 0.007128154 | 0.875430423 | 0.875430423 | 99579466.45     | 0.441279289       | 225660866   |
| 32      | 56984229.13 | 0.000126438 | 0.027080201 | 0.027080201 | 28492114.58     | 0.013603319       | 2094497236  |
| 33      | 833954827.5 | 0.001850393 | 0.027080201 | 0.027080201 | 416977413.8     | 0.014465297       | 28826052551 |
| 34      | 3893738.92  | 8.63949E-06 | 0.027080201 | 0.027080201 | 1946869.474     | 0.01354442        | 143739595   |
| 35      | 3893738.92  | 0.000247299 | 1.47763E-05 | 0.177183541 | 1946869.46      | 0.08871542        | 21945108    |
| 36      | 372093.8225 | 2.36325E-05 | 3.77965E-05 | 0.45322006  | 186046.9113     | 0.226621846       | 820958      |
| 37      | 9243471.288 | 0.048266741 | 0.070679215 | 145.2668655 | 4621735.68      | 72.65756612       | 63610       |

**Table S2-B.** Kinetic Data of Elementary Ratchets for the Ratchet Directionality Metric,  $\lambda < 1$  (Figure 4 in the main paper).

| Dataset | k1,blue     | k-1, blue   | k2,green    | k-2,green   | (k1g + k1b)*0.5 | (k-1g + k-1b)*0.5 | $\lambda$   |
|---------|-------------|-------------|-------------|-------------|-----------------|-------------------|-------------|
| 38      | 1.04E-05    | 5.60E-01    | 1.88E-01    | 6.45E-11    | 0.094238132     | 0.280201599       | 0.336322608 |
| 39      | 1.04E-05    | 5.60E-01    | 1.40E-03    | 6.01E-06    | 0.000704218     | 0.280204606       | 0.002513229 |
| 40      | 1.29E-03    | 1.10E+07    | 1.12E+06    | 1.21E+01    | 558249.9543     | 5495310.258       | 0.101586613 |
| 41      | 5.05E-09    | 3.42E+03    | 1.47E+01    | 1.47E+01    | 7.36671919      | 1719.798555       | 0.004283478 |
| 42      | 5.19E-11    | 1.18E+01    | 2.07E+00    | 2.65E-02    | 1.036076949     | 5.937328198       | 0.17450222  |
| 43      | 1.76E+00    | 3.57E+10    | 1.29E+04    | 3.42E+01    | 6457.455145     | 17835413911       | 3.62058E-07 |
| 44      | 4.29E+00    | 4.47E+09    | 1.03E+04    | 5.75E+01    | 5170.86503      | 2236165001        | 2.31238E-06 |
| 45      | 7.16E+02    | 2.92E+04    | 6.62E+03    | 1.63E+02    | 3670.469939     | 14678.55128       | 0.250056689 |
| 46      | 1.64E+03    | 1.15E+05    | 3.98E+04    | 6.76E+01    | 20702.18037     | 57582.05653       | 0.359524852 |
| 47      | 0.002776585 | 4635.606641 | 425.605574  | 0.030241981 | 212.8041753     | 2317.818442       | 0.091812271 |
| 48      | 0.003294901 | 69068618.47 | 1315349.081 | 0.17301432  | 657674.542      | 34534309.32       | 0.019044091 |
| 49      | 0.002485126 | 5729798.935 | 157642.8319 | 0.090326173 | 78821.41719     | 2864899.513       | 0.027512803 |
| 50      | 6.12491E-15 | 12138137.57 | 3424.863671 | 2.17074E-11 | 1712.431835     | 6069068.787       | 0.000282157 |
| 51      | 113.6792769 | 0.032075434 | 3.773282457 | 877.1189507 | 58.7262797      | 438.575513        | 0.133902322 |
| 52      | 9.983432454 | 3452023.819 | 412041.9815 | 83.6396488  | 206025.9825     | 1726053.729       | 0.119362439 |
| 53      | 0.036756235 | 7039116.252 | 3424.863671 | 3424.863671 | 1712.450213     | 3521270.558       | 0.000486316 |
| 54      | 0.016977859 | 2029881724  | 83.6396488  | 412041.9815 | 41.82831333     | 1015146883        | 4.12042E-08 |
| 55      | 1.19066E-06 | 83709020.2  | 0.008973115 | 1824458.918 | 0.004487153     | 42766739.56       | 1.04922E-10 |
| 56      | 0.011635111 | 163.744831  | 1.752584586 | 5.784004503 | 0.882109848     | 84.76441776       | 0.010406605 |
| 57      | 0.00132472  | 32150.12658 | 866.6779529 | 7260.893479 | 433.3396388     | 19705.51003       | 0.021990785 |
| 58      | 2.49063E-06 | 1119.923347 | 16.23496489 | 195.9121277 | 8.117483691     | 657.9177376       | 0.012338144 |
| 59      | 1.08027E-29 | 441623.5461 | 0.019503136 | 413.5655088 | 0.009751568     | 221018.5558       | 4.4121E-08  |
| 60      | 3.12381E-26 | 1277038871  | 0.052813923 | 1119.923347 | 0.026406962     | 638519995.7       | 4.13565E-11 |
| 61      | 2.61209E-19 | 23748061.71 | 0.387290106 | 680.5598203 | 0.193645053     | 11874371.14       | 1.63078E-08 |
| 62      | 2.72684E-14 | 1321175.789 | 152.7215505 | 152.7215505 | 76.36077525     | 660664.2552       | 0.000115582 |
| 63      | 1.77005E-08 | 4455020.037 | 488418.4402 | 1943.784117 | 244209.2201     | 2228481.91        | 0.109585462 |
| 64      | 8.011E-08   | 5981392430  | 5377.774384 | 8.287368734 | 2688.887192     | 2990696219        | 8.99084E-07 |
| 65      | 7.07348E-19 | 64309059.14 | 1119.923347 | 0.052813923 | 559.9616737     | 32154529.6        | 1.74147E-05 |
| 66      | 1.36086E-23 | 24568.84036 | 374.351789  | 0.010727982 | 187.1758945     | 12284.42554       | 0.015236846 |
| 67      | 9.51366E-29 | 487601414.9 | 1740806.395 | 1.325758023 | 870403.1973     | 243800708.1       | 0.003570142 |
| 68      | 4.91009E-08 | 5870.523539 | 0.142237873 | 0.002026519 | 0.071118961     | 2935.262783       | 2.42292E-05 |
| 69      | 1.19499E-06 | 25049.62807 | 1.253723952 | 0.023876033 | 0.626862574     | 12524.82597       | 5.00496E-05 |
| 70      | 1.03936E-08 | 99102.87193 | 0.06775002  | 0.000465253 | 0.033875015     | 49551.4362        | 6.83633E-07 |
| 71      | 4.74413E-07 | 6016715241  | 88797.07172 | 88797.07172 | 44398.53586     | 3008402019        | 1.47582E-05 |

**Table S3-A.** Model results (Equation 13) of the time-averaged surface coverage of C\* at temperatures of 213–393 K decreases in surface coverage of C\* with increasing applied frequency.  $\alpha = 0.78$ ,  $\beta = 0.67$ ,  $\gamma = 2$ ,  $\delta = 0.3$ ,  $\Delta BE_C = 0.6$  eV. Data are the lines in Figure 7a.

| Frequency (1/s) | 213      | 243      | 293      | 343      | 393      |
|-----------------|----------|----------|----------|----------|----------|
| 0.01            | 0.313484 | 0.499655 | 0.5      | 0.5      | 0.5      |
| 0.02            | 0.212473 | 0.498689 | 0.5      | 0.5      | 0.5      |
| 0.03            | 0.159901 | 0.497196 | 0.5      | 0.5      | 0.5      |
| 0.04            | 0.128036 | 0.495255 | 0.5      | 0.5      | 0.5      |
| 0.05            | 0.106719 | 0.492934 | 0.5      | 0.5      | 0.5      |
| 0.06            | 0.091473 | 0.490293 | 0.499999 | 0.5      | 0.5      |
| 0.07            | 0.080033 | 0.48738  | 0.499999 | 0.5      | 0.5      |
| 0.08            | 0.071136 | 0.484241 | 0.499999 | 0.5      | 0.5      |
| 0.09            | 0.064018 | 0.480912 | 0.499998 | 0.5      | 0.5      |
| 0.1             | 0.058196 | 0.477425 | 0.499998 | 0.5      | 0.5      |
| 0.2             | 0.030495 | 0.438584 | 0.499992 | 0.5      | 0.5      |
| 0.3             | 0.020681 | 0.399961 | 0.499983 | 0.5      | 0.5      |
| 0.4             | 0.015658 | 0.365322 | 0.49997  | 0.5      | 0.5      |
| 0.5             | 0.012606 | 0.335139 | 0.499953 | 0.5      | 0.5      |
| 0.6             | 0.010556 | 0.309004 | 0.499932 | 0.5      | 0.5      |
| 0.7             | 0.009083 | 0.286335 | 0.499908 | 0.5      | 0.5      |
| 0.8             | 0.007974 | 0.266576 | 0.499881 | 0.5      | 0.5      |
| 0.9             | 0.007109 | 0.249249 | 0.499849 | 0.5      | 0.5      |
| 1               | 0.006415 | 0.23396  | 0.499815 | 0.5      | 0.5      |
| 2               | 0.003276 | 0.144306 | 0.499287 | 0.499999 | 0.5      |
| 3               | 0.002222 | 0.104135 | 0.498455 | 0.499998 | 0.5      |
| 4               | 0.001695 | 0.081448 | 0.497352 | 0.499997 | 0.5      |
| 5               | 0.001377 | 0.066888 | 0.496009 | 0.499996 | 0.5      |
| 6               | 0.001166 | 0.056754 | 0.494454 | 0.499994 | 0.5      |
| 7               | 0.001015 | 0.049297 | 0.492709 | 0.499991 | 0.5      |
| 8               | 0.000901 | 0.043579 | 0.490798 | 0.499989 | 0.5      |
| 9               | 0.000813 | 0.039057 | 0.488739 | 0.499986 | 0.5      |
| 10              | 0.000742 | 0.03539  | 0.486551 | 0.499982 | 0.5      |
| 20              | 0.000424 | 0.018337 | 0.460309 | 0.49993  | 0.5      |
| 30              | 0.000318 | 0.012444 | 0.431411 | 0.499844 | 0.499999 |
| 40              | 0.000265 | 0.009457 | 0.403418 | 0.499727 | 0.499998 |
| 50              | 0.000233 | 0.007651 | 0.377523 | 0.499578 | 0.499998 |
| 60              | 0.000212 | 0.006442 | 0.354007 | 0.499399 | 0.499996 |
| 70              | 0.000197 | 0.005575 | 0.332801 | 0.499191 | 0.499995 |
| 80              | 0.000185 | 0.004924 | 0.313711 | 0.498956 | 0.499994 |
| 90              | 0.000177 | 0.004416 | 0.296509 | 0.498693 | 0.499992 |
| 100             | 0.00017  | 0.00401  | 0.280971 | 0.498405 | 0.49999  |
| 200             | 0.000138 | 0.002174 | 0.183098 | 0.494286 | 0.499961 |
| 300             | 0.000127 | 0.00156  | 0.135468 | 0.48842  | 0.499914 |
| 400             | 0.000122 | 0.001252 | 0.107521 | 0.481359 | 0.499848 |

  

| Frequency (1/s) | 213         | 243         | 293         | 343         | 393         |
|-----------------|-------------|-------------|-------------|-------------|-------------|
| 500             | 0.000118624 | 0.001067722 | 0.089182177 | 0.473503048 | 0.499765342 |
| 600             | 0.0001165   | 0.000944564 | 0.076232867 | 0.465139828 | 0.499665022 |
| 700             | 0.000114984 | 0.000856567 | 0.066604813 | 0.456479924 | 0.499547994 |
| 800             | 0.000113846 | 0.000790554 | 0.059166797 | 0.447676713 | 0.4994147   |
| 900             | 0.000112962 | 0.000739201 | 0.053248488 | 0.438842073 | 0.499265571 |
| 1000            | 0.000112254 | 0.000698113 | 0.048427606 | 0.430057346 | 0.499101025 |
| 2000            | 0.000109069 | 0.000513154 | 0.0257376   | 0.352086774 | 0.496692624 |
| 3000            | 0.000108007 | 0.000451479 | 0.017793147 | 0.294595267 | 0.493132473 |
| 4000            | 0.000107477 | 0.000420637 | 0.013745854 | 0.252385526 | 0.488697936 |
| 5000            | 0.000107158 | 0.00040213  | 0.011292972 | 0.220498061 | 0.483605304 |
| 6000            | 0.000106946 | 0.000389792 | 0.009647391 | 0.195690605 | 0.478024041 |
| 7000            | 0.000106794 | 0.000380978 | 0.008466882 | 0.175891804 | 0.472087433 |
| 8000            | 0.00010668  | 0.000374368 | 0.007578701 | 0.159746597 | 0.465900623 |
| 9000            | 0.000106592 | 0.000369227 | 0.006886228 | 0.146340294 | 0.459546728 |
| 10000           | 0.000106521 | 0.000365114 | 0.006331197 | 0.135036415 | 0.453091524 |
| 20000           | 0.000106203 | 0.000346604 | 0.003821925 | 0.076800093 | 0.390410495 |
| 30000           | 0.000106096 | 0.000340434 | 0.002981249 | 0.054261068 | 0.338533641 |
| 40000           | 0.000106043 | 0.000337349 | 0.002560109 | 0.04231026  | 0.297560776 |
| 50000           | 0.000106012 | 0.000335498 | 0.002307168 | 0.034907622 | 0.265016726 |
| 60000           | 0.00010599  | 0.000334264 | 0.002138434 | 0.029872305 | 0.238756777 |
| 70000           | 0.000105975 | 0.000333382 | 0.002017856 | 0.026225417 | 0.217208063 |
| 80000           | 0.000105964 | 0.000332721 | 0.001927395 | 0.023462331 | 0.199247412 |
| 90000           | 0.000105955 | 0.000332207 | 0.001857019 | 0.021296518 | 0.184068034 |
| 100000          | 0.000105948 | 0.000331795 | 0.001800707 | 0.019553219 | 0.171081531 |
| 200000          | 0.000105916 | 0.000329944 | 0.001547187 | 0.011589302 | 0.101441871 |
| 300000          | 0.000105905 | 0.000329327 | 0.001462637 | 0.008890619 | 0.073250786 |
| 400000          | 0.0001059   | 0.000329019 | 0.001420354 | 0.007532882 | 0.058020145 |
| 500000          | 0.000105897 | 0.000328834 | 0.001394982 | 0.006715535 | 0.048487091 |
| 600000          | 0.000105895 | 0.00032871  | 0.001378066 | 0.006169506 | 0.041959341 |
| 700000          | 0.000105893 | 0.000328622 | 0.001365982 | 0.005778931 | 0.037209602 |
| 800000          | 0.000105892 | 0.000328556 | 0.00135692  | 0.005485695 | 0.033598645 |
| 900000          | 0.000105891 | 0.000328505 | 0.001349871 | 0.005257442 | 0.030760825 |
| 1000000         | 0.00010589  | 0.000328463 | 0.001344231 | 0.005074726 | 0.028471879 |

**Table S3-B.** Simulation results of the time-averaged surface coverage of C\* at temperatures of 253-213 K decreases in surface coverage of C\* with increasing applied frequency. ( $\alpha = 0.7$ ,  $\beta = 0.5$ ,  $\gamma = 1.2$ ,  $\delta = 0.5$ ,  $\Delta BE_C = 0.2$  eV.) Data points in Figure 7b.

| Frequency (1/s) | 253         | 273         | 293         | 233         | 213         |
|-----------------|-------------|-------------|-------------|-------------|-------------|
| 0.01            | 0.964983784 | 0.956786949 | 0.948168592 | 0.972618457 | 0.9795407   |
| 0.03            | 0.964983932 | 0.95678698  | 0.9481686   | 0.972619349 | 0.979548066 |
| 0.06            | 0.964984153 | 0.956787026 | 0.948168612 | 0.972620686 | 0.9795591   |
| 0.1             | 0.964984448 | 0.956787088 | 0.948168628 | 0.972622469 | 0.9795738   |
| 0.3             | 0.964985922 | 0.956787399 | 0.948168707 | 0.972631383 | 0.979647149 |
| 0.6             | 0.964988134 | 0.956787864 | 0.948168826 | 0.972644755 | 0.9797572   |
| 1               | 0.964991083 | 0.956788485 | 0.948168984 | 0.972662583 | 0.9799040   |
| 3               | 0.965005827 | 0.956791588 | 0.948169775 | 0.972751727 | 0.980636751 |
| 6               | 0.965027944 | 0.956796243 | 0.948170962 | 0.972885442 | 0.9816616   |
| 10              | 0.965057433 | 0.956802449 | 0.948172544 | 0.973063728 | 0.9826665   |
| 30              | 0.965204879 | 0.956833481 | 0.948180455 | 0.973953242 | 0.984084507 |
| 60              | 0.965426047 | 0.956880029 | 0.948192322 | 0.975183149 | 0.9843187   |
| 100             | 0.965720937 | 0.956942093 | 0.94821     | 0.976343455 | 0.9843728   |
| 300             | 0.967167524 | 0.957252413 | 0.948287258 | 0.977863937 | 0.984400415 |
| 600             | 0.968831961 | 0.957717882 | 0.948405928 | 0.978100754 | 0.9844030   |
| 1000            | 0.969942533 | 0.95833677  | 0.948564155 | 0.978154861 | 0.9844036   |
| 3000            | 0.970918468 | 0.960851992 | 0.949355179 | 0.978182425 | 0.984403863 |
| 6000            | 0.971036448 | 0.962333607 | 0.95051722  | 0.978185026 | 0.9844039   |
| 10000           | 0.971062384 | 0.962866947 | 0.951828942 | 0.978185582 | 0.9844039   |
| 30000           | 0.971075457 | 0.963186121 | 0.954162569 | 0.97818586  | 0.984403894 |
| 60000           | 0.971076687 | 0.963218216 | 0.954622273 | 0.978185886 | 0.9843598   |
| 100000          | 0.971076949 | 0.963225114 | 0.954732076 | 0.978185891 | 0.9844039   |
| 300000          | 0.97107708  | 0.963228571 | 0.954788733 | 0.978185883 | 0.984403897 |
| 600000          | 0.971077092 | 0.963228895 | 0.954794106 | 0.978094816 | 0.9844039   |
| 1000000         | 0.971077095 | 0.963228964 | 0.954795254 | 0.974870415 | 0.9844039   |
| k1,blue         | 44.09383598 | 299.4274354 | 1565.429312 | 4.673544368 | 0.324987522 |
| k-1,blue        | 4331.040939 | 21016.29828 | 82200.26263 | 680.5598203 | 75.54502413 |
| k2,green        | 159.2934492 | 984.5679352 | 4745.703376 | 18.85158853 | 1.494313281 |
| k-2,green       | 2497.621131 | 12618.40516 | 51102.76934 | 374.351789  | 39.28666494 |

**Table S3-C.** Model results of the time-averaged surface coverage of C\* at temperatures of 253-213 K decreases in surface coverage of C\* with increasing applied frequency. ( $\alpha = 0.7$ ,  $\beta = 0.5$ ,  $\gamma = 1.2$ ,  $\delta = 0.5$ ,  $\Delta BE_C = 0.2$  eV.) Lines in Figure 7b.

| Frequency (1/s) | 253      | 273      | 293      | 233      | 213      | Frequency (1/s) | 253      | 273      | 293      | 233      | 213      |
|-----------------|----------|----------|----------|----------|----------|-----------------|----------|----------|----------|----------|----------|
| 0.01            | 0.964984 | 0.956787 | 0.948169 | 0.972618 | 0.979537 | 100             | 0.96531  | 0.956807 | 0.94817  | 0.975121 | 0.983943 |
| 0.02            | 0.964984 | 0.956787 | 0.948169 | 0.972618 | 0.979537 | 200             | 0.965845 | 0.956858 | 0.948174 | 0.976206 | 0.984165 |
| 0.03            | 0.964984 | 0.956787 | 0.948169 | 0.972618 | 0.979537 | 300             | 0.966356 | 0.956932 | 0.94818  | 0.976729 | 0.984243 |
| 0.04            | 0.964984 | 0.956787 | 0.948169 | 0.972618 | 0.979537 | 400             | 0.966803 | 0.957021 | 0.948188 | 0.977034 | 0.984282 |
| 0.05            | 0.964984 | 0.956787 | 0.948169 | 0.972618 | 0.979538 | 500             | 0.967184 | 0.95712  | 0.948198 | 0.977234 | 0.984306 |
| 0.06            | 0.964984 | 0.956787 | 0.948169 | 0.972618 | 0.979538 | 600             | 0.967508 | 0.957225 | 0.94821  | 0.977375 | 0.984322 |
| 0.07            | 0.964984 | 0.956787 | 0.948169 | 0.972618 | 0.979538 | 700             | 0.967787 | 0.957335 | 0.948224 | 0.977479 | 0.984334 |
| 0.08            | 0.964984 | 0.956787 | 0.948169 | 0.972618 | 0.979538 | 800             | 0.968026 | 0.957446 | 0.948239 | 0.97756  | 0.984342 |
| 0.09            | 0.964984 | 0.956787 | 0.948169 | 0.972618 | 0.979539 | 900             | 0.968235 | 0.957559 | 0.948255 | 0.977624 | 0.984349 |
| 0.1             | 0.964984 | 0.956787 | 0.948169 | 0.972618 | 0.979539 | 1000            | 0.968418 | 0.95767  | 0.948273 | 0.977676 | 0.984355 |
| 0.2             | 0.964984 | 0.956787 | 0.948169 | 0.972618 | 0.979544 | 2000            | 0.969465 | 0.958669 | 0.948497 | 0.977922 | 0.984379 |
| 0.3             | 0.964984 | 0.956787 | 0.948169 | 0.972618 | 0.979552 | 3000            | 0.969923 | 0.959411 | 0.948767 | 0.978008 | 0.984387 |
| 0.4             | 0.964984 | 0.956787 | 0.948169 | 0.972618 | 0.979563 | 4000            | 0.970179 | 0.959959 | 0.949048 | 0.978052 | 0.984392 |
| 0.5             | 0.964984 | 0.956787 | 0.948169 | 0.972619 | 0.979576 | 5000            | 0.970342 | 0.960374 | 0.949323 | 0.978078 | 0.984394 |
| 0.6             | 0.964984 | 0.956787 | 0.948169 | 0.972619 | 0.979591 | 6000            | 0.970455 | 0.960698 | 0.949584 | 0.978096 | 0.984396 |
| 0.7             | 0.964984 | 0.956787 | 0.948169 | 0.972619 | 0.979608 | 7000            | 0.970538 | 0.960957 | 0.94983  | 0.978109 | 0.984397 |
| 0.8             | 0.964984 | 0.956787 | 0.948169 | 0.972619 | 0.979627 | 8000            | 0.970601 | 0.961168 | 0.950058 | 0.978118 | 0.984398 |
| 0.9             | 0.964984 | 0.956787 | 0.948169 | 0.97262  | 0.979647 | 9000            | 0.970651 | 0.961344 | 0.95027  | 0.978126 | 0.984398 |
| 1               | 0.964984 | 0.956787 | 0.948169 | 0.97262  | 0.979668 | 10000           | 0.970692 | 0.961493 | 0.950467 | 0.978132 | 0.984399 |
| 2               | 0.964984 | 0.956787 | 0.948169 | 0.972627 | 0.979923 | 20000           | 0.97088  | 0.962259 | 0.95181  | 0.978159 | 0.984401 |
| 3               | 0.964984 | 0.956787 | 0.948169 | 0.972636 | 0.980205 | 30000           | 0.970944 | 0.962556 | 0.95253  | 0.978168 | 0.984402 |
| 4               | 0.964985 | 0.956787 | 0.948169 | 0.97265  | 0.980478 | 40000           | 0.970977 | 0.962714 | 0.952973 | 0.978172 | 0.984403 |
| 5               | 0.964985 | 0.956787 | 0.948169 | 0.972665 | 0.98073  | 50000           | 0.970997 | 0.962812 | 0.953271 | 0.978175 | 0.984403 |
| 6               | 0.964986 | 0.956787 | 0.948169 | 0.972684 | 0.98096  | 60000           | 0.97101  | 0.962879 | 0.953486 | 0.978177 | 0.984403 |
| 7               | 0.964986 | 0.956787 | 0.948169 | 0.972705 | 0.981167 | 70000           | 0.97102  | 0.962927 | 0.953648 | 0.978178 | 0.984403 |
| 8               | 0.964987 | 0.956787 | 0.948169 | 0.972727 | 0.981353 | 80000           | 0.971027 | 0.962964 | 0.953775 | 0.978179 | 0.984403 |
| 9               | 0.964988 | 0.956787 | 0.948169 | 0.972751 | 0.981521 | 90000           | 0.971032 | 0.962992 | 0.953876 | 0.97818  | 0.984403 |
| 10              | 0.964989 | 0.956787 | 0.948169 | 0.972777 | 0.981672 | 100000          | 0.971037 | 0.963015 | 0.953959 | 0.97818  | 0.984403 |
| 20              | 0.965003 | 0.956788 | 0.948169 | 0.973084 | 0.982628 | 200000          | 0.971057 | 0.963121 | 0.954356 | 0.978183 | 0.984404 |
| 30              | 0.965026 | 0.956789 | 0.948169 | 0.973418 | 0.983093 | 300000          | 0.971064 | 0.963157 | 0.954498 | 0.978184 | 0.984404 |
| 40              | 0.965054 | 0.95679  | 0.948169 | 0.973739 | 0.983366 | 400000          | 0.971067 | 0.963175 | 0.95457  | 0.978185 | 0.984404 |
| 50              | 0.965088 | 0.956792 | 0.948169 | 0.974034 | 0.983545 | 500000          | 0.971069 | 0.963185 | 0.954615 | 0.978185 | 0.984404 |
| 60              | 0.965126 | 0.956794 | 0.948169 | 0.9743   | 0.983672 | 600000          | 0.97107  | 0.963193 | 0.954644 | 0.978185 | 0.984404 |
| 70              | 0.965168 | 0.956797 | 0.948169 | 0.97454  | 0.983766 | 700000          | 0.971071 | 0.963198 | 0.954666 | 0.978185 | 0.984404 |
| 80              | 0.965213 | 0.9568   | 0.948169 | 0.974754 | 0.983838 | 800000          | 0.971072 | 0.963202 | 0.954682 | 0.978185 | 0.984404 |
| 90              | 0.965261 | 0.956803 | 0.94817  | 0.974947 | 0.983896 | 900000          | 0.971073 | 0.963205 | 0.954694 | 0.978185 | 0.984404 |
|                 |          |          |          |          |          | 1000000         | 0.971073 | 0.963207 | 0.954704 | 0.978185 | 0.984404 |

**Table S3-D.** Simulation results of the time-averaged surface coverage of C\* at temperatures of 193-273 K decreases in surface coverage of C\* with increasing applied frequency. ( $\alpha = 0.5$ ,  $\beta = 0.5$ ,  $\gamma = 2$ ,  $\delta = 0.3$ ,  $\Delta BE_C = 0.5$  eV) Data points in Figure 7c.

| Frequency (1/s) | 193         | 213         | 233        | 253        | 273         |
|-----------------|-------------|-------------|------------|------------|-------------|
| 0.01            | 0.500029542 | 0.500011941 | 0.50002383 | 0.50005138 | 0.5001000   |
| 0.03            | 0.500082657 | 0.500017398 | 0.50002465 | 0.50005154 | 0.500100092 |
| 0.06            | 0.50016233  | 0.500025582 | 0.50002589 | 0.50005179 | 0.5001002   |
| 0.1             | 0.50026856  | 0.500036495 | 0.50002754 | 0.50005213 | 0.5001002   |
| 0.3             | 0.500799713 | 0.50009106  | 0.50003579 | 0.5000538  | 0.500100668 |
| 0.6             | 0.501596442 | 0.500172906 | 0.50004816 | 0.50005631 | 0.5001013   |
| 1               | 0.502658748 | 0.500282034 | 0.50006465 | 0.50005966 | 0.5001022   |
| 3               | 0.507970275 | 0.500827677 | 0.50014712 | 0.50007639 | 0.500106436 |
| 6               | 0.515937566 | 0.50164614  | 0.50027083 | 0.50010149 | 0.5001128   |
| 10              | 0.526560619 | 0.502737425 | 0.50043577 | 0.50013496 | 0.5001214   |
| 30              | 0.579471419 | 0.508193848 | 0.50126047 | 0.5003023  | 0.500164117 |
| 60              | 0.651276393 | 0.516378482 | 0.50249753 | 0.50055331 | 0.5002282   |
| 100             | 0.721219822 | 0.527291327 | 0.50415    | 0.50088799 | 0.5003137   |
| 300             | 0.857954847 | 0.581583941 | 0.51239398 | 0.50256139 | 0.500740924 |
| 600             | 0.910690285 | 0.654272005 | 0.52476455 | 0.50507149 | 0.5013818   |
| 1000            | 0.933216026 | 0.723607755 | 0.54125803 | 0.5084183  | 0.5022363   |
| 3000            | 0.95023507  | 0.855964967 | 0.62069112 | 0.5251523  | 0.506508989 |
| 6000            | 0.952200358 | 0.905135687 | 0.70866295 | 0.55024683 | 0.5129180   |
| 10000           | 0.95263056  | 0.924098796 | 0.77675459 | 0.5833328  | 0.5214632   |
| 30000           | 0.952847158 | 0.936661588 | 0.88181093 | 0.70918433 | 0.564123004 |
| 60000           | 0.952867516 | 0.937996246 | 0.91027865 | 0.79699502 | 0.6241461   |
| 100000          | 0.95287186  | 0.938285085 | 0.91840898 | 0.84710522 | 0.6865209   |
| 300000          | 0.952874032 | 0.938430058 | 0.92289063 | 0.89827004 | 0.818029551 |
| 600000          | 0.952874236 | 0.938443668 | 0.92332698 | 0.90569329 | 0.8663286   |
| 1000000         | 0.952874279 | 0.938446572 | 0.92342044 | 0.90738072 | 0.8825021   |
| k1,blue         | 0.000105898 | 0.004157147 | 0.08691013 | 1.1235861  | 9.983432454 |
| k-1,blue        | 7236.942879 | 52217.11552 | 268367.69  | 1064754.73 | 3452023.819 |
| k2,green        | 357.9128643 | 3424.863671 | 22239.2563 | 107434.155 | 412041.9815 |
| k-2,green       | 0.002141243 | 0.063381853 | 1.04877032 | 11.1355984 | 83.6396488  |

**Table S3-E.** Model results of the time-averaged surface coverage of C\* at temperatures of 193-273 K decreases in surface coverage of C\* with increasing applied frequency. ( $\alpha = 0.5$ ,  $\beta = 0.5$ ,  $\gamma = 2$ ,  $\delta = 0.3$ ,  $\Delta BE_C = 0.5$  eV) Lines in Figure 7c.

| Frequency (1/s) | Time (s)    | 193        | 213        | 233         | 253         | 273        | Frequency (1/s) | Time (s) | 193      | 213      | 233      | 253      | 273      |
|-----------------|-------------|------------|------------|-------------|-------------|------------|-----------------|----------|----------|----------|----------|----------|----------|
| 0.01            | 100         | 0.5000001  | 0.5        | 0.5         | 0.5         | 0.5        | 100             | 0.01     | 0.716174 | 0.51572  | 0.500511 | 0.500022 | 0.500001 |
| 0.02            | 50          | 0.5000009  | 0.5        | 0.5         | 0.5         | 0.5        | 200             | 0.005    | 0.802434 | 0.544453 | 0.501907 | 0.500088 | 0.500006 |
| 0.03            | 33.33333333 | 0.5000002  | 0.5        | 0.5         | 0.5         | 0.5        | 300             | 0.003333 | 0.842956 | 0.574432 | 0.504018 | 0.500195 | 0.500013 |
| 0.04            | 25          | 0.50000036 | 0.5        | 0.5         | 0.5         | 0.5        | 400             | 0.0025   | 0.866342 | 0.602295 | 0.5067   | 0.500342 | 0.500023 |
| 0.05            | 20          | 0.50000056 | 0.5000001  | 0.5         | 0.5         | 0.5        | 500             | 0.002    | 0.88154  | 0.627249 | 0.50984  | 0.500526 | 0.500036 |
| 0.06            | 16.66666667 | 0.50000081 | 0.5000001  | 0.5         | 0.5         | 0.5        | 600             | 0.001667 | 0.892204 | 0.649326 | 0.513344 | 0.500747 | 0.500052 |
| 0.07            | 14.28571429 | 0.50000111 | 0.5000001  | 0.5         | 0.5         | 0.5        | 700             | 0.001429 | 0.900097 | 0.668813 | 0.517134 | 0.501002 | 0.500071 |
| 0.08            | 12.5        | 0.50000144 | 0.5000002  | 0.5         | 0.5         | 0.5        | 800             | 0.00125  | 0.906174 | 0.686046 | 0.521146 | 0.501291 | 0.500092 |
| 0.09            | 11.11111111 | 0.50000183 | 0.5000002  | 0.5         | 0.5         | 0.5        | 900             | 0.001111 | 0.910997 | 0.701341 | 0.525328 | 0.501611 | 0.500116 |
| 0.1             | 10          | 0.50000225 | 0.5000002  | 0.50000001  | 0.5         | 0.5        | 1000            | 0.001    | 0.914918 | 0.714977 | 0.529637 | 0.501961 | 0.500143 |
| 0.2             | 5           | 0.50000897 | 0.5000001  | 0.50000002  | 0.5         | 0.5        | 2000            | 0.0005   | 0.933273 | 0.797467 | 0.574135 | 0.50686  | 0.500549 |
| 0.3             | 3.333333333 | 0.50002009 | 0.50000021 | 0.50000005  | 0.5         | 0.5        | 3000            | 0.000333 | 0.939663 | 0.835776 | 0.614079 | 0.513613 | 0.501191 |
| 0.4             | 2.5         | 0.50003556 | 0.50000038 | 0.50000009  | 0.5         | 0.5        | 4000            | 0.00025  | 0.942911 | 0.857767 | 0.647395 | 0.521504 | 0.502042 |
| 0.5             | 2           | 0.50005532 | 0.5000006  | 0.50000014  | 0.50000001  | 0.5        | 5000            | 0.0002   | 0.944877 | 0.872015 | 0.674905 | 0.530053 | 0.503079 |
| 0.6             | 1.666666667 | 0.50007931 | 0.50000086 | 0.50000002  | 0.50000001  | 0.5        | 6000            | 0.000167 | 0.946195 | 0.881991 | 0.697759 | 0.538937 | 0.504281 |
| 0.7             | 1.428571429 | 0.50010748 | 0.50000117 | 0.50000027  | 0.50000001  | 0.5        | 7000            | 0.000143 | 0.94714  | 0.889365 | 0.716941 | 0.547936 | 0.505629 |
| 0.8             | 1.25        | 0.50013976 | 0.50000153 | 0.50000035  | 0.50000001  | 0.5        | 8000            | 0.000125 | 0.947851 | 0.895037 | 0.73322  | 0.556903 | 0.507107 |
| 0.9             | 1.111111111 | 0.50017611 | 0.50000193 | 0.50000044  | 0.50000002  | 0.5        | 9000            | 0.000111 | 0.948405 | 0.899534 | 0.747182 | 0.56574  | 0.508701 |
| 1               | 1           | 0.50021647 | 0.50000238 | 0.50000055  | 0.50000002  | 0.5        | 10000           | 0.0001   | 0.948849 | 0.903187 | 0.759276 | 0.574381 | 0.510395 |
| 2               | 0.5         | 0.50082922 | 0.50000948 | 0.50000219  | 0.50000009  | 0.5        | 20000           | 0.00005  | 0.950855 | 0.920263 | 0.82642  | 0.64615  | 0.530765 |
| 3               | 0.333333333 | 0.50178841 | 0.50002123 | 0.500000492 | 0.50000002  | 0.5        | 30000           | 3.33E-05 | 0.951527 | 0.926197 | 0.85469  | 0.694841 | 0.553279 |
| 4               | 0.25        | 0.50305027 | 0.50003757 | 0.500000874 | 0.500000036 | 0.5        | 40000           | 0.000025 | 0.951863 | 0.929211 | 0.870223 | 0.728859 | 0.575149 |
| 5               | 0.2         | 0.50457633 | 0.50005843 | 0.500001365 | 0.500000057 | 0.5        | 50000           | 0.00002  | 0.952065 | 0.931035 | 0.880037 | 0.75373  | 0.595427 |
| 6               | 0.166666667 | 0.50633271 | 0.50008375 | 0.500001964 | 0.500000081 | 0.50000001 | 60000           | 1.67E-05 | 0.9522   | 0.932258 | 0.886799 | 0.772632 | 0.613875 |
| 7               | 0.142857143 | 0.50828956 | 0.50011348 | 0.500002671 | 0.500000111 | 0.50000001 | 70000           | 1.43E-05 | 0.952296 | 0.933134 | 0.891739 | 0.787458 | 0.630535 |
| 8               | 0.125       | 0.51042048 | 0.50014753 | 0.500003487 | 0.500000145 | 0.50000001 | 80000           | 1.25E-05 | 0.952368 | 0.933793 | 0.895507 | 0.799386 | 0.645553 |
| 9               | 0.111111111 | 0.51270216 | 0.50018587 | 0.50000441  | 0.500000183 | 0.50000001 | 90000           | 1.11E-05 | 0.952424 | 0.934307 | 0.898476 | 0.809183 | 0.659101 |
| 10              | 0.1         | 0.51511395 | 0.50022842 | 0.50000544  | 0.500000226 | 0.50000001 | 100000          | 0.00001  | 0.952469 | 0.934718 | 0.900874 | 0.817372 | 0.671349 |
| 20              | 0.05        | 0.54322158 | 0.50087337 | 0.500021605 | 0.500000903 | 0.50000006 | 200000          | 0.000005 | 0.952672 | 0.936577 | 0.911941 | 0.858572 | 0.748729 |
| 30              | 0.033333333 | 0.57296612 | 0.50188023 | 0.500048266 | 0.500002028 | 0.50000013 | 300000          | 3.33E-06 | 0.952739 | 0.9372   | 0.915732 | 0.874101 | 0.786516 |
| 40              | 0.025       | 0.60090836 | 0.50320134 | 0.500085199 | 0.500003601 | 0.50000024 | 400000          | 2.5E-06  | 0.952773 | 0.937511 | 0.917648 | 0.882247 | 0.808724 |
| 50              | 0.02        | 0.62614111 | 0.50479504 | 0.500132185 | 0.500005618 | 0.50000037 | 500000          | 0.000002 | 0.952793 | 0.937698 | 0.918803 | 0.887263 | 0.823311 |
| 60              | 0.016666667 | 0.64861417 | 0.50662483 | 0.500189008 | 0.500008077 | 0.50000053 | 600000          | 1.67E-06 | 0.952807 | 0.937823 | 0.919576 | 0.890662 | 0.833618 |
| 70              | 0.014285714 | 0.66855778 | 0.50865872 | 0.500255459 | 0.500010978 | 0.50000072 | 700000          | 1.43E-06 | 0.952816 | 0.937912 | 0.920129 | 0.893117 | 0.841284 |
| 80              | 0.0125      | 0.68627326 | 0.51086858 | 0.500331331 | 0.500014317 | 0.50000095 | 800000          | 1.25E-06 | 0.952824 | 0.937979 | 0.920545 | 0.894974 | 0.847209 |
| 90              | 0.011111111 | 0.70205688 | 0.51322969 | 0.500416424 | 0.500018093 | 0.5000012  | 900000          | 1.11E-06 | 0.952829 | 0.938031 | 0.920869 | 0.896427 | 0.851925 |
|                 |             |            |            |             |             |            | 1000000         | 0.000001 | 0.952834 | 0.938073 | 0.921128 | 0.897596 | 0.855766 |

**Table S3-F.** Model cutoff frequencies as a function of temperature for the three ratchets of Figure 7a-7c. Data are the lines of Figure 7d.

| Inverse Temp (1/K) | Cutoff Frequency (Hz) | Inverse Temp (1/K) | Cutoff Frequency (Hz) | Inverse Temp (1/K) | Cutoff Frequency (Hz) |
|--------------------|-----------------------|--------------------|-----------------------|--------------------|-----------------------|
| 5.780346821        | 6.31806E-06           | 5.780346821        | 5.54704277            | 6.535947712        | 0.000330628           |
| 5.18134715         | 0.000420866           | 5.464480874        | 24.0372885            | 5.780346821        | 0.022647299           |
| 4.926108374        | 0.002518709           | 5.18134715         | 89.47821607           | 5.18134715         | 0.646013606           |
| 4.694835681        | 0.012742404           | 4.926108374        | 292.6237475           | 4.694835681        | 9.821666235           |
| 4.484304933        | 0.05574156            | 4.694835681        | 856.2159177           | 4.291845494        | 93.58794724           |
| 4.291845494        | 0.214828354           | 4.484304933        | 2275.300464           | 3.95256917         | 624.4052828           |
| 4.115226337        | 0.740936238           | 4.291845494        | 5559.814071           | 3.663003663        | 3154.601289           |
| 3.95256917         | 2.317207859           | 4.115226337        | 12622.51381           | 3.412969283        | 12775.69233           |
| 3.802281369        | 6.644962889           | 3.95256917         | 26858.53882           | 3.95256917         | 624.4052828           |
| 3.663003663        | 17.6401236            | 3.802281369        | 53961.09712           | 3.663003663        | 3154.601289           |
| 3.533568905        | 43.70643492           | 3.663003663        | 103010.4954           | 3.412969283        | 12775.69233           |
| 3.412969283        | 101.7869163           | 3.533568905        | 187861.423            | 3.194888179        | 43270.9372            |
| 3.300330033        | 224.1839073           | 3.412969283        | 328837.2702           | 3.003003003        | 126580.584            |
| 3.194888179        | 469.4675414           | 3.300330033        | 554721.9997           | 2.83286119         | 327879.3022           |
| 3.095975232        | 939.1402975           | 3.194888179        | 905021.5572           | 2.680965147        | 766891.9223           |
| 3.003003003        | 1802.062301           |                    |                       |                    |                       |
| 2.915451895        | 3328.935464           |                    |                       |                    |                       |
| 2.83286119         | 5939.361846           |                    |                       |                    |                       |
| 2.754820937        | 10264.10434           |                    |                       |                    |                       |
| 2.680965147        | 17225.16494           |                    |                       |                    |                       |
| 2.610966057        | 28136.14584           |                    |                       |                    |                       |
| 2.544529262        | 44825.07016           |                    |                       |                    |                       |
| 2.421307506        | 106328.6326           |                    |                       |                    |                       |



**Table S4-A.** Simulation results of the time-averaged surface coverage of C\* at temperatures of 273-353 K decreases in surface coverage of C\* with increasing applied frequency. ( $\alpha = 0.7$ ,  $\beta = 0.7$ ,  $\delta = 0.1$ ,  $\Delta BE_C = 0.2$  eV) Data points in Figure 8b.

| Frequency (1/s) | 273         | 293         | 313         | 333         | 353         |
|-----------------|-------------|-------------|-------------|-------------|-------------|
| 0.01            | 0.499818215 | 0.499969119 | 0.499993426 | 0.499998316 | 0.4999995   |
| 0.03            | 0.499454645 | 0.499907357 | 0.499980278 | 0.499994949 | 0.499998492 |
| 0.06            | 0.498909289 | 0.499814714 | 0.499960556 | 0.499989898 | 0.4999970   |
| 0.1             | 0.498182149 | 0.49969119  | 0.49993426  | 0.499983163 | 0.4999950   |
| 0.3             | 0.494546446 | 0.499073569 | 0.49980278  | 0.499949489 | 0.499984919 |
| 0.6             | 0.489092892 | 0.498147138 | 0.49960556  | 0.499898977 | 0.4999698   |
| 1               | 0.481821486 | 0.496911897 | 0.4993426   | 0.499831628 | 0.4999497   |
| 3               | 0.445470472 | 0.49073569  | 0.498027799 | 0.499494885 | 0.499849186 |
| 6               | 0.392074332 | 0.481471381 | 0.496055598 | 0.498989771 | 0.4996984   |
| 10              | 0.330026514 | 0.469118971 | 0.493425996 | 0.498316285 | 0.4994973   |
| 30              | 0.173889946 | 0.407796595 | 0.480277988 | 0.494948854 | 0.498491864 |
| 60              | 0.100857375 | 0.327478497 | 0.460556119 | 0.489897708 | 0.4969837   |
| 100             | 0.065185018 | 0.253218301 | 0.43430     | 0.483162846 | 0.4949729   |
| 300             | 0.025016901 | 0.116127452 | 0.318879239 | 0.449491492 | 0.484918641 |
| 600             | 0.014210265 | 0.065084356 | 0.218256124 | 0.399749522 | 0.4698373   |
| 1000            | 0.009928079 | 0.042054797 | 0.152617791 | 0.340671972 | 0.4497317   |
| 3000            | 0.006595168 | 0.017396989 | 0.062899809 | 0.18546629  | 0.355028968 |
| 6000            | 0.006193156 | 0.011497458 | 0.035557457 | 0.110303446 | 0.2577407   |
| 10000           | 0.00610448  | 0.009713167 | 0.024027148 | 0.073111654 | 0.1868574   |
| 30000           | 0.006059738 | 0.00869217  | 0.013593089 | 0.030967438 | 0.081438192 |
| 60000           | 0.006055529 | 0.00859105  | 0.012100151 | 0.020441765 | 0.0475108   |
| 100000          | 0.006054631 | 0.008569348 | 0.011759519 | 0.01719152  | 0.0331549   |
| 300000          | 0.006054182 | 0.00855848  | 0.011585963 | 0.01531238  | 0.021114276 |
| 600000          | 0.00605414  | 0.008557461 | 0.011569578 | 0.01512542  | 0.0195691   |
| 1000000         | 0.006054131 | 0.008557243 | 0.01156608  | 0.015085275 | 0.0192247   |
| k1,blue         | 8980.557485 | 37224.19001 | 128656.1856 | 383123.4537 | 1008198.799 |
| k-1,blue        | 0.025972239 | 0.257102338 | 1.898759054 | 11.02873552 | 52.48111077 |
| k2,green        | 0.000158122 | 0.002217269 | 0.022186333 | 0.168345114 | 1.015279823 |
| k-2,green       | 54.67461546 | 321.024046  | 1503.302383 | 5848.083061 | 19504.23464 |

**Table S4-B.** Model results of the time-averaged surface coverage of C\* at temperatures of 273-353 K decreases in surface coverage of C\* with increasing applied frequency. ( $\alpha = 0.7$ ,  $\beta = 0.7$ ,  $\delta = 0.1$ ,  $\Delta BE_C = 0.2$  eV) Lines in Figure 8b.

| Frequency (1/s) | Time (s) | 273       | 293      | 313      | 333      | 353      |
|-----------------|----------|-----------|----------|----------|----------|----------|
| 0.01            | 100      | 0.4999989 | 0.5      | 0.5      | 0.5      | 0.5      |
| 0.02            | 50       | 0.4999958 | 0.5      | 0.5      | 0.5      | 0.5      |
| 0.03            | 33.33333 | 0.4999906 | 0.5      | 0.5      | 0.5      | 0.5      |
| 0.04            | 25       | 0.4999833 | 0.5      | 0.5      | 0.5      | 0.5      |
| 0.05            | 20       | 0.4999739 | 0.499999 | 0.5      | 0.5      | 0.5      |
| 0.06            | 16.66667 | 0.4999626 | 0.499999 | 0.5      | 0.5      | 0.5      |
| 0.07            | 14.28571 | 0.4999492 | 0.499999 | 0.5      | 0.5      | 0.5      |
| 0.08            | 12.5     | 0.4999339 | 0.499998 | 0.5      | 0.5      | 0.5      |
| 0.09            | 11.11111 | 0.4999166 | 0.499998 | 0.5      | 0.5      | 0.5      |
| 0.1             | 10       | 0.4998973 | 0.499997 | 0.5      | 0.5      | 0.5      |
| 0.2             | 5        | 0.4996007 | 0.499988 | 0.499999 | 0.5      | 0.5      |
| 0.3             | 3.333333 | 0.4991266 | 0.499973 | 0.499999 | 0.5      | 0.5      |
| 0.4             | 2.5      | 0.4984899 | 0.499952 | 0.499998 | 0.5      | 0.5      |
| 0.5             | 2        | 0.4977044 | 0.499926 | 0.499997 | 0.5      | 0.5      |
| 0.6             | 1.666667 | 0.4967827 | 0.499893 | 0.499995 | 0.5      | 0.5      |
| 0.7             | 1.428571 | 0.4957363 | 0.499856 | 0.499993 | 0.5      | 0.5      |
| 0.8             | 1.25     | 0.4945761 | 0.499812 | 0.499991 | 0.499999 | 0.5      |
| 0.9             | 1.111111 | 0.4933117 | 0.499764 | 0.499989 | 0.499999 | 0.5      |
| 1               | 1        | 0.4919523 | 0.499709 | 0.499986 | 0.499999 | 0.5      |
| 2               | 0.5      | 0.4746843 | 0.498892 | 0.499946 | 0.499996 | 0.5      |
| 3               | 0.333333 | 0.4540346 | 0.497622 | 0.499879 | 0.499992 | 0.499999 |
| 4               | 0.25     | 0.4326723 | 0.495962 | 0.499788 | 0.499986 | 0.499999 |
| 5               | 0.2      | 0.411828  | 0.493967 | 0.499672 | 0.499978 | 0.499998 |
| 6               | 0.166667 | 0.3920471 | 0.491685 | 0.499532 | 0.499968 | 0.499997 |
| 7               | 0.142857 | 0.3735386 | 0.489158 | 0.49937  | 0.499956 | 0.499996 |
| 8               | 0.125    | 0.3563444 | 0.486421 | 0.499186 | 0.499943 | 0.499995 |
| 9               | 0.111111 | 0.3404253 | 0.483507 | 0.49898  | 0.499928 | 0.499993 |
| 10              | 0.1      | 0.3257042 | 0.480443 | 0.498753 | 0.499912 | 0.499992 |
| 20              | 0.05     | 0.2256169 | 0.445628 | 0.49548  | 0.499656 | 0.499968 |
| 30              | 0.033333 | 0.1723457 | 0.410065 | 0.490743 | 0.499246 | 0.499929 |
| 40              | 0.025    | 0.1396949 | 0.377532 | 0.484955 | 0.498695 | 0.499875 |
| 50              | 0.02     | 0.1177059 | 0.348752 | 0.478427 | 0.498013 | 0.499806 |
| 60              | 0.016667 | 0.1019089 | 0.323534 | 0.471391 | 0.49721  | 0.499723 |
| 70              | 0.014286 | 0.0900181 | 0.301449 | 0.464021 | 0.496297 | 0.499625 |
| 80              | 0.0125   | 0.0807469 | 0.282047 | 0.45645  | 0.495282 | 0.499515 |
| 90              | 0.011111 | 0.0733168 | 0.264921 | 0.448777 | 0.494173 | 0.49939  |

  

| Frequency (1/s) | Time (s) | 273      | 293      | 313      | 333      | 353      |
|-----------------|----------|----------|----------|----------|----------|----------|
| 100             | 0.01     | 0.06723  | 0.249723 | 0.441078 | 0.492978 | 0.499253 |
| 200             | 0.005    | 0.038157 | 0.159085 | 0.370165 | 0.477622 | 0.497236 |
| 300             | 0.003333 | 0.027813 | 0.117677 | 0.315345 | 0.458943 | 0.494226 |
| 400             | 0.0025   | 0.022251 | 0.094086 | 0.273902 | 0.439346 | 0.490446 |
| 500             | 0.002    | 0.019285 | 0.078867 | 0.241966 | 0.42     | 0.486071 |
| 600             | 0.001667 | 0.017117 | 0.068241 | 0.216763 | 0.40146  | 0.481241 |
| 700             | 0.001429 | 0.01556  | 0.060403 | 0.196429 | 0.383967 | 0.476069 |
| 800             | 0.00125  | 0.014387 | 0.054383 | 0.179707 | 0.367597 | 0.470644 |
| 900             | 0.001111 | 0.013471 | 0.049615 | 0.165726 | 0.352346 | 0.465038 |
| 1000            | 0.001    | 0.012737 | 0.045746 | 0.153872 | 0.338164 | 0.459312 |
| 2000            | 0.0005   | 0.009413 | 0.0277   | 0.091863 | 0.239929 | 0.402327 |
| 3000            | 0.000333 | 0.008297 | 0.021445 | 0.06745  | 0.186476 | 0.353628 |
| 4000            | 0.00025  | 0.007738 | 0.018271 | 0.054414 | 0.153348 | 0.314341 |
| 5000            | 0.0002   | 0.007402 | 0.016351 | 0.046307 | 0.130886 | 0.282665 |
| 6000            | 0.000167 | 0.007177 | 0.015065 | 0.040779 | 0.114677 | 0.256821 |
| 7000            | 0.000143 | 0.007017 | 0.014144 | 0.036769 | 0.102436 | 0.23543  |
| 8000            | 0.000125 | 0.006897 | 0.01345  | 0.033726 | 0.092869 | 0.217478 |
| 9000            | 0.000111 | 0.006803 | 0.01291  | 0.031339 | 0.085186 | 0.202222 |
| 10000           | 0.0001   | 0.006729 | 0.012478 | 0.029416 | 0.078883 | 0.18911  |
| 20000           | 0.00005  | 0.006392 | 0.010523 | 0.020615 | 0.04866  | 0.117875 |
| 30000           | 3.33E-05 | 0.006279 | 0.009869 | 0.017626 | 0.03786  | 0.088614 |
| 40000           | 0.000025 | 0.006223 | 0.009542 | 0.016121 | 0.032314 | 0.072707 |
| 50000           | 0.00002  | 0.006189 | 0.009345 | 0.015215 | 0.028938 | 0.062715 |
| 60000           | 1.67E-05 | 0.006167 | 0.009214 | 0.014609 | 0.026667 | 0.055858 |
| 70000           | 1.43E-05 | 0.006151 | 0.00912  | 0.014176 | 0.025035 | 0.050861 |
| 80000           | 1.25E-05 | 0.006139 | 0.00905  | 0.013851 | 0.023805 | 0.047058 |
| 90000           | 1.11E-05 | 0.006129 | 0.008995 | 0.013597 | 0.022846 | 0.044066 |
| 100000          | 0.00001  | 0.006122 | 0.008951 | 0.013395 | 0.022076 | 0.041652 |
| 200000          | 0.000005 | 0.006088 | 0.008754 | 0.012481 | 0.018588 | 0.030544 |
| 300000          | 3.33E-06 | 0.006077 | 0.008689 | 0.012175 | 0.017417 | 0.026752 |
| 400000          | 2.5E-06  | 0.006071 | 0.008656 | 0.012023 | 0.01683  | 0.024839 |
| 500000          | 0.000002 | 0.006068 | 0.008636 | 0.011931 | 0.016478 | 0.023685 |
| 600000          | 1.67E-06 | 0.006065 | 0.008623 | 0.01187  | 0.016242 | 0.022914 |
| 700000          | 1.43E-06 | 0.006064 | 0.008613 | 0.011826 | 0.016074 | 0.022362 |
| 800000          | 1.25E-06 | 0.006063 | 0.008606 | 0.011793 | 0.015948 | 0.021947 |
| 900000          | 1.11E-06 | 0.006062 | 0.008601 | 0.011768 | 0.015849 | 0.021624 |
| 1000000         | 0.000001 | 0.006061 | 0.008597 | 0.011748 | 0.015771 | 0.021365 |

**Table S5-A.** Simulation results of the time-averaged surface coverage of C\* at temperatures of 273 K with varying duty cycle changes in surface coverage of C\* with increasing applied frequency. ( $\alpha = 0.78$ ,  $\beta = 0.67$  eV,  $\gamma_{D/C} = 2.0$ ,  $\delta_{C-D} = 0.3$ ,  $\Delta BE_C = 0.6$  eV) Data points in Figure 9a.

| Duty Cycle      | 0.0001   | 0.001    | 0.01     | 0.1      | 0.5      | 0.9      | 0.99     | 0.999    |
|-----------------|----------|----------|----------|----------|----------|----------|----------|----------|
| Frequency (1/s) | 273      | 273      | 273      | 273      | 273      | 273      | 273      | 273      |
| 0.01            | 0.14131  | 0.429201 | 0.492914 | 0.499291 | 0.499858 | 0.499922 | 0.499934 | 0.499985 |
| 0.03            | 0.054452 | 0.307651 | 0.478742 | 0.497874 | 0.499575 | 0.499765 | 0.499802 | 0.499955 |
| 0.06            | 0.028284 | 0.206003 | 0.457484 | 0.495749 | 0.49915  | 0.499531 | 0.499604 | 0.499911 |
| 0.1             | 0.017235 | 0.14131  | 0.429201 | 0.492915 | 0.498584 | 0.499218 | 0.49934  | 0.499851 |
| 0.3             | 0.005837 | 0.054452 | 0.307652 | 0.478744 | 0.495752 | 0.497655 | 0.498021 | 0.499554 |
| 0.6             | 0.002931 | 0.028284 | 0.206004 | 0.457488 | 0.491503 | 0.49531  | 0.496042 | 0.499108 |
| 1               | 0.001763 | 0.017235 | 0.141312 | 0.429207 | 0.485839 | 0.492183 | 0.493403 | 0.498513 |
| 3               | 0.00059  | 0.005837 | 0.054454 | 0.307664 | 0.457518 | 0.476548 | 0.480209 | 0.495539 |
| 6               | 0.000297 | 0.002932 | 0.028286 | 0.206019 | 0.415269 | 0.453096 | 0.460408 | 0.49101  |
| 10              | 0.000179 | 0.001763 | 0.017237 | 0.141329 | 0.362533 | 0.421941 | 0.433926 | 0.484349 |
| 30              | 6.17E-05 | 0.000591 | 0.005839 | 0.054473 | 0.206152 | 0.293338 | 0.317763 | 0.458436 |
| 60              | 3.23E-05 | 0.000297 | 0.002933 | 0.028305 | 0.122145 | 0.192906 | 0.219526 | 0.447512 |
| 100             | 2.06E-05 | 0.000179 | 0.00176  | 0.017257 | 0.078866 | 0.131405 | 0.158089 | 0.443965 |
| 300             | 8.79E-06 | 6.19E-05 | 0.000592 | 0.005859 | 0.028476 | 0.051068 | 0.089792 | 0.441781 |
| 600             | 5.85E-06 | 3.25E-05 | 0.000299 | 0.002953 | 0.014614 | 0.027303 | 0.077737 | 0.441545 |
| 1000            | 4.68E-06 | 2.07E-05 | 0.000181 | 0.001785 | 0.008916 | 0.017497 | 0.074615 | 0.441493 |
| 3000            | 3.5E-06  | 8.97E-06 | 6.37E-05 | 0.000612 | 0.00313  | 0.00894  | 0.072877 | 0.441466 |
| 6000            | 3.21E-06 | 6.03E-06 | 3.43E-05 | 0.000319 | 0.001709 | 0.007616 | 0.0727   | 0.441463 |
| 10000           | 3.09E-06 | 4.88E-06 | 2.28E-05 | 0.000205 | 0.001209 | 0.007282 | 0.072662 | 0.441463 |
| 30000           | 2.99E-06 | 3.9E-06  | 1.3E-05  | 0.00011  | 0.000855 | 0.007098 | 0.072642 | 0.441463 |
| 60000           | 2.98E-06 | 3.75E-06 | 1.15E-05 | 9.64E-05 | 0.00081  | 0.007079 | 0.07264  | 0.441463 |
| 100000          | 2.97E-06 | 3.71E-06 | 1.11E-05 | 9.29E-05 | 0.0008   | 0.007075 | 0.07264  | 0.441462 |
| 300000          | 2.97E-06 | 3.69E-06 | 1.09E-05 | 9.1E-05  | 0.000794 | 0.007073 | 0.07264  | 0.441463 |
| 600000          | 2.97E-06 | 3.68E-06 | 1.09E-05 | 9.09E-05 | 0.000794 | 0.007073 | 0.07264  | 0.441463 |
| 1000000         | 2.97E-06 | 3.68E-06 | 1.09E-05 | 9.08E-05 | 0.000794 | 0.007073 | 0.072651 | 0.441463 |
| k1,blue         | 0.000204 | 0.000204 | 0.000204 | 0.000204 | 0.000204 | 0.000204 | 0.000204 | 0.000204 |
| k-1,blue        | 70.56049 | 70.56049 | 70.56049 | 70.56049 | 70.56049 | 70.56049 | 70.56049 | 70.56049 |
| k2,green        | 89183.85 | 89183.85 | 89183.85 | 89183.85 | 89183.85 | 89183.85 | 89183.85 | 89183.85 |
| k-2,green       | 0.257924 | 0.257924 | 0.257924 | 0.257924 | 0.257924 | 0.257924 | 0.257924 | 0.257924 |

**Table S5-B.** Model results of the time-averaged surface coverage of C\* at temperatures of 273 K with varying duty cycle changes in surface coverage of C\* with increasing applied frequency. ( $\alpha = 0.78$ ,  $\beta = 0.67$  eV,  $\gamma_{D/C} = 2.0$ ,  $\delta_{C-D} = 0.3$ ,  $\Delta BE_C = 0.6$  eV) Lines in Figure 9a.

| Duty Cycle      | 0.0001   | 0.001    | 0.01     | 0.05     | 0.1      | 0.5      | 0.9      | 0.99     | 0.999    |
|-----------------|----------|----------|----------|----------|----------|----------|----------|----------|----------|
| Frequency (1/s) | 273      | 273      | 273      | 273      | 273      | 273      | 273      | 273      | 273      |
| 0.01            | 0.13871  | 0.434554 | 0.498561 | 0.499937 | 0.499984 | 0.499999 | 0.5      | 0.5      | 0.5      |
| 0.02            | 0.07777  | 0.358836 | 0.494815 | 0.499754 | 0.499937 | 0.499997 | 0.499999 | 0.499999 | 0.5      |
| 0.03            | 0.053996 | 0.301727 | 0.489437 | 0.499459 | 0.49986  | 0.499994 | 0.499998 | 0.499999 | 0.5      |
| 0.04            | 0.041348 | 0.259211 | 0.482917 | 0.499059 | 0.499754 | 0.49999  | 0.499997 | 0.499998 | 0.5      |
| 0.05            | 0.0335   | 0.22679  | 0.475614 | 0.498561 | 0.49962  | 0.499984 | 0.499995 | 0.499997 | 0.5      |
| 0.06            | 0.028156 | 0.201396 | 0.467792 | 0.497972 | 0.499459 | 0.499977 | 0.499993 | 0.499995 | 0.499999 |
| 0.07            | 0.024282 | 0.181025 | 0.459648 | 0.497297 | 0.499272 | 0.499969 | 0.499991 | 0.499993 | 0.499999 |
| 0.08            | 0.021345 | 0.164348 | 0.451326 | 0.496543 | 0.499059 | 0.49996  | 0.499988 | 0.499991 | 0.499999 |
| 0.09            | 0.019041 | 0.150455 | 0.442935 | 0.495714 | 0.498822 | 0.499949 | 0.499984 | 0.499989 | 0.499998 |
| 0.1             | 0.017187 | 0.13871  | 0.434555 | 0.494816 | 0.498561 | 0.499937 | 0.499981 | 0.499986 | 0.499998 |
| 0.2             | 0.008708 | 0.07777  | 0.358838 | 0.482918 | 0.494816 | 0.499755 | 0.499924 | 0.499945 | 0.499993 |
| 0.3             | 0.005832 | 0.053996 | 0.30173  | 0.467794 | 0.489439 | 0.49946  | 0.49983  | 0.499878 | 0.499984 |
| 0.4             | 0.004384 | 0.041349 | 0.259215 | 0.451329 | 0.48292  | 0.49906  | 0.499702 | 0.499786 | 0.499971 |
| 0.5             | 0.003512 | 0.033501 | 0.226793 | 0.434559 | 0.475618 | 0.498563 | 0.49954  | 0.499669 | 0.499955 |
| 0.6             | 0.00293  | 0.028156 | 0.2014   | 0.418053 | 0.467797 | 0.497975 | 0.499346 | 0.499529 | 0.499937 |
| 0.7             | 0.002513 | 0.024282 | 0.18103  | 0.402116 | 0.459654 | 0.497301 | 0.499121 | 0.499365 | 0.499915 |
| 0.8             | 0.002201 | 0.021345 | 0.164352 | 0.386902 | 0.451334 | 0.496548 | 0.498866 | 0.49918  | 0.49989  |
| 0.9             | 0.001957 | 0.019042 | 0.15046  | 0.372475 | 0.442944 | 0.49572  | 0.498581 | 0.498974 | 0.499862 |
| 1               | 0.001762 | 0.017188 | 0.138716 | 0.358848 | 0.434565 | 0.494823 | 0.498269 | 0.498746 | 0.499831 |
| 2               | 0.000884 | 0.008708 | 0.077776 | 0.259231 | 0.358861 | 0.482944 | 0.49383  | 0.495488 | 0.499392 |
| 3               | 0.00059  | 0.005832 | 0.054003 | 0.20142  | 0.301762 | 0.467843 | 0.487549 | 0.490815 | 0.498761 |
| 4               | 0.000444 | 0.004385 | 0.041356 | 0.164375 | 0.259253 | 0.451402 | 0.480036 | 0.485158 | 0.497997 |
| 5               | 0.000356 | 0.003513 | 0.033508 | 0.13874  | 0.226837 | 0.434657 | 0.471724 | 0.478828 | 0.49714  |
| 6               | 0.000297 | 0.002931 | 0.028163 | 0.119983 | 0.201448 | 0.418176 | 0.46292  | 0.472055 | 0.496224 |
| 7               | 0.000255 | 0.002514 | 0.024289 | 0.105676 | 0.181081 | 0.402263 | 0.453866 | 0.46501  | 0.495269 |
| 8               | 0.000223 | 0.002201 | 0.021352 | 0.094408 | 0.164406 | 0.387071 | 0.444661 | 0.457818 | 0.494293 |
| 9               | 0.000199 | 0.001958 | 0.019049 | 0.085308 | 0.150516 | 0.372666 | 0.435479 | 0.450572 | 0.49331  |
| 10              | 0.000179 | 0.001763 | 0.017195 | 0.077805 | 0.138773 | 0.359059 | 0.426382 | 0.44334  | 0.492328 |
| 9.12E-05        | 0.000885 | 0.008715 | 0.041387 | 0.077844 | 0.259592 | 0.34681  | 0.378205 | 0.483458 |          |
| 30              | 6.18E-05 | 0.000591 | 0.005839 | 0.028195 | 0.054074 | 0.201867 | 0.28921  | 0.329269 | 0.47677  |
| 40              | 4.71E-05 | 0.000444 | 0.004392 | 0.021384 | 0.041429 | 0.164878 | 0.247391 | 0.292926 | 0.471792 |
| 50              | 3.82E-05 | 0.000356 | 0.00352  | 0.017227 | 0.033582 | 0.139281 | 0.216034 | 0.265257 | 0.467997 |
| 60              | 3.24E-05 | 0.000298 | 0.002938 | 0.014425 | 0.028238 | 0.120552 | 0.19177  | 0.243611 | 0.465025 |
| 70              | 2.82E-05 | 0.000256 | 0.002521 | 0.012409 | 0.024365 | 0.106266 | 0.172483 | 0.226263 | 0.462641 |
| 80              | 2.5E-05  | 0.000224 | 0.002209 | 0.010889 | 0.021429 | 0.095016 | 0.156805 | 0.21207  | 0.460689 |
| 90              | 2.26E-05 | 0.0002   | 0.001965 | 0.009702 | 0.019126 | 0.085929 | 0.143819 | 0.200253 | 0.459063 |

  

| Duty Cycle      | 0.0001   | 0.001    | 0.01     | 0.05     | 0.1      | 0.5      | 0.9      | 0.99     | 0.999    |
|-----------------|----------|----------|----------|----------|----------|----------|----------|----------|----------|
| Frequency (1/s) | 273      | 273      | 273      | 273      | 273      | 273      | 273      | 273      | 273      |
| 100             | 2.06E-05 | 0.00018  | 0.00177  | 0.008749 | 0.017272 | 0.078437 | 0.132892 | 0.190268 | 0.457689 |
| 200             | 1.18E-05 | 9.19E-05 | 0.000892 | 0.004425 | 0.008794 | 0.042074 | 0.07691  | 0.138523 | 0.450559 |
| 300             | 8.85E-06 | 6.25E-05 | 0.000598 | 0.002971 | 0.005918 | 0.028902 | 0.055378 | 0.118365 | 0.447778 |
| 400             | 7.38E-06 | 4.78E-05 | 0.000452 | 0.002242 | 0.004471 | 0.022101 | 0.04399  | 0.107648 | 0.446299 |
| 500             | 6.5E-06  | 3.9E-05  | 0.000363 | 0.001804 | 0.0036   | 0.01795  | 0.036946 | 0.100999 | 0.44538  |
| 600             | 5.91E-06 | 3.31E-05 | 0.000305 | 0.001511 | 0.003017 | 0.015153 | 0.032159 | 0.096472 | 0.445755 |
| 700             | 5.49E-06 | 2.89E-05 | 0.000263 | 0.001302 | 0.002601 | 0.01314  | 0.028694 | 0.093191 | 0.444302 |
| 800             | 5.18E-06 | 2.57E-05 | 0.000231 | 0.001145 | 0.002288 | 0.011622 | 0.02607  | 0.090705 | 0.443959 |
| 900             | 4.93E-06 | 2.33E-05 | 0.000207 | 0.001023 | 0.002045 | 0.010436 | 0.024014 | 0.088754 | 0.443689 |
| 1000            | 4.74E-06 | 2.13E-05 | 0.000187 | 0.000925 | 0.00185  | 0.009484 | 0.02236  | 0.087184 | 0.443472 |
| 2000            | 3.85E-06 | 1.25E-05 | 9.91E-05 | 0.000485 | 0.000971 | 0.005168 | 0.014807 | 0.080007 | 0.442481 |
| 3000            | 3.56E-06 | 9.56E-06 | 6.97E-05 | 0.000338 | 0.000678 | 0.003716 | 0.012249 | 0.077572 | 0.442144 |
| 4000            | 3.41E-06 | 8.09E-06 | 5.5E-05  | 0.000265 | 0.000531 | 0.002988 | 0.010963 | 0.076347 | 0.441975 |
| 5000            | 3.32E-06 | 7.21E-06 | 4.62E-05 | 0.000221 | 0.000443 | 0.00255  | 0.010189 | 0.07561  | 0.441873 |
| 6000            | 3.27E-06 | 6.62E-06 | 4.03E-05 | 0.000191 | 0.000385 | 0.002258 | 0.009671 | 0.075117 | 0.441805 |
| 7000            | 3.22E-06 | 6.2E-06  | 3.61E-05 | 0.00017  | 0.000343 | 0.002049 | 0.009301 | 0.074764 | 0.441756 |
| 8000            | 3.19E-06 | 5.89E-06 | 3.29E-05 | 0.000155 | 0.000311 | 0.001892 | 0.009024 | 0.0745   | 0.44172  |
| 9000            | 3.17E-06 | 5.64E-06 | 3.05E-05 | 0.000143 | 0.000287 | 0.00177  | 0.008808 | 0.074294 | 0.441691 |
| 10000           | 3.15E-06 | 5.45E-06 | 2.85E-05 | 0.000133 | 0.000267 | 0.001673 | 0.008635 | 0.074129 | 0.441668 |
| 20000           | 3.06E-06 | 4.57E-06 | 1.97E-05 | 8.86E-05 | 0.000179 | 0.001233 | 0.007855 | 0.073385 | 0.441566 |
| 30000           | 3.03E-06 | 4.27E-06 | 1.68E-05 | 7.39E-05 | 0.00015  | 0.001087 | 0.007594 | 0.073137 | 0.441531 |
| 40000           | 3.02E-06 | 4.13E-06 | 1.53E-05 | 6.66E-05 | 0.000135 | 0.001014 | 0.007464 | 0.073013 | 0.441514 |
| 50000           | 3.01E-06 | 4.04E-06 | 1.44E-05 | 6.22E-05 | 0.000126 | 0.000997 | 0.007386 | 0.072938 | 0.441504 |
| 60000           | 3E-06    | 3.98E-06 | 1.38E-05 | 5.92E-05 | 0.00012  | 0.000994 | 0.007334 | 0.072889 | 0.441497 |
| 70000           | 3E-06    | 3.94E-06 | 1.34E-05 | 5.71E-05 | 0.000116 | 0.000919 | 0.007297 | 0.072853 | 0.441492 |
| 80000           | 2.99E-06 | 3.9E-06  | 1.31E-05 | 5.56E-05 | 0.000113 | 0.000904 | 0.007269 | 0.072826 | 0.441488 |
| 90000           | 2.99E-06 | 3.88E-06 | 1.28E-05 | 5.43E-05 | 0.00011  | 0.000891 | 0.007247 | 0.072806 | 0.441485 |
| 100000          | 2.99E-06 | 3.86E-06 | 1.26E-05 | 5.34E-05 | 0.000108 | 0.000881 | 0.00723  | 0.072789 | 0.441483 |
| 200000          | 2.98E-06 | 3.77E-06 | 1.18E-05 | 4.89E-05 | 9.96E-05 | 0.000837 | 0.007151 | 0.072714 | 0.441473 |
| 300000          | 2.98E-06 | 3.74E-06 | 1.15E-05 | 4.75E-05 | 9.67E-05 | 0.000823 | 0.007125 | 0.07269  | 0.441469 |
| 400000          | 2.98E-06 | 3.73E-06 | 1.13E-05 | 4.67E-05 | 9.52E-05 | 0.000815 | 0.007112 | 0.072677 | 0.441468 |
| 500000          | 2.97E-06 | 3.72E-06 | 1.12E-05 | 4.63E-05 | 9.43E-05 | 0.000811 | 0.007104 | 0.07267  | 0.441467 |
| 600000          | 2.97E-06 | 3.71E-06 | 1.12E-05 | 4.6E-05  | 9.37E-05 | 0.000808 | 0.007099 | 0.072665 | 0.441466 |
| 700000          | 2.97E-06 | 3.71E-06 | 1.11E-05 | 4.58E-05 | 9.33E-05 | 0.000806 | 0.007095 | 0.072661 | 0.441465 |
| 800000          | 2.97E-06 | 3.71E-06 | 1.11E-05 | 4.56E-05 | 9.3E-05  | 0.000804 | 0.007093 | 0.072659 | 0.441465 |
| 900000          | 2.97E-06 | 3.7E-06  | 1.11E-05 | 4.55E-05 | 9.28E-05 | 0.000803 | 0.007091 | 0.072656 | 0.441465 |
| 1000000         | 2.97E-06 | 3.7E-06  | 1.11E-05 | 4.54E-05 | 9.26E-05 | 0.000802 | 0.007089 | 0.072655 | 0.441465 |

**Table S5-C.** Simulation results of the time-averaged surface coverage of C\* at temperatures of 153 K with varying duty cycle changes in surface coverage of C\* with increasing applied frequency. ( $\alpha = 0.5$ ,  $\beta = 0.375$  eV,  $\gamma_{D/C} = 2.0$ ,  $\delta_{C-D} = 0.25$ ,  $\Delta BE_C = 0.5$  eV) Data points in Figure 9b.

| Duty Cycle      | 0.0001   | 0.001    | 0.01     | 0.1      | 0.5      | 0.9      | 0.99     | 0.999    | 0.9999   |
|-----------------|----------|----------|----------|----------|----------|----------|----------|----------|----------|
| Frequency (1/s) | 153      | 153      | 153      | 153      | 153      | 153      | 153      | 153      | 153      |
| 0.01            | 0.49914  | 0.499914 | 0.499991 | 0.499999 | 0.5      | 0.500001 | 0.500009 | 0.500086 | 0.50086  |
| 0.03            | 0.497419 | 0.499742 | 0.499974 | 0.499998 | 0.5      | 0.500002 | 0.500026 | 0.500258 | 0.502581 |
| 0.06            | 0.494837 | 0.499484 | 0.499949 | 0.499995 | 0.5      | 0.500005 | 0.500051 | 0.500516 | 0.505163 |
| 0.1             | 0.491396 | 0.49914  | 0.499915 | 0.499992 | 0.5      | 0.500008 | 0.500085 | 0.50086  | 0.508604 |
| 0.3             | 0.474187 | 0.497421 | 0.499744 | 0.499977 | 0.5      | 0.500023 | 0.500256 | 0.502579 | 0.525813 |
| 0.6             | 0.448377 | 0.494842 | 0.499489 | 0.499954 | 0.5      | 0.500046 | 0.500511 | 0.505158 | 0.551623 |
| 1               | 0.414214 | 0.491403 | 0.499148 | 0.499924 | 0.5      | 0.500076 | 0.500852 | 0.508597 | 0.585786 |
| 3               | 0.279077 | 0.47421  | 0.497445 | 0.499771 | 0.5      | 0.500229 | 0.502555 | 0.52579  | 0.720923 |
| 6               | 0.179746 | 0.448424 | 0.494889 | 0.499541 | 0.5      | 0.500459 | 0.505111 | 0.551576 | 0.820254 |
| 10              | 0.120803 | 0.414288 | 0.491482 | 0.499235 | 0.5      | 0.500765 | 0.508518 | 0.585712 | 0.879197 |
| 30              | 0.045464 | 0.279222 | 0.474445 | 0.497705 | 0.5      | 0.502295 | 0.525555 | 0.720778 | 0.954536 |
| 60              | 0.023472 | 0.179924 | 0.44889  | 0.495411 | 0.5      | 0.504589 | 0.55111  | 0.820076 | 0.976528 |
| 100             | 0.014274 | 0.120999 | 0.41503  | 0.492351 | 0.5      | 0.507649 | 0.584972 | 0.879001 | 0.985726 |
| 300             | 0.004836 | 0.045679 | 0.280679 | 0.477053 | 0.5      | 0.522947 | 0.719321 | 0.954321 | 0.995164 |
| 600             | 0.002438 | 0.023692 | 0.181728 | 0.454064 | 0.5      | 0.545936 | 0.818272 | 0.976308 | 0.997562 |
| 1000            | 0.001475 | 0.014496 | 0.122973 | 0.423244 | 0.5      | 0.576756 | 0.877027 | 0.985504 | 0.998525 |
| 3000            | 0.000509 | 0.00506  | 0.04785  | 0.296878 | 0.5      | 0.703122 | 0.95215  | 0.99494  | 0.999491 |
| 6000            | 0.000269 | 0.002684 | 0.02612  | 0.203503 | 0.5      | 0.796497 | 0.97388  | 0.997316 | 0.999731 |
| 10000           | 0.00018  | 0.001797 | 0.017703 | 0.15355  | 0.5      | 0.84645  | 0.982297 | 0.998203 | 0.99982  |
| 30000           | 0.000113 | 0.001125 | 0.011216 | 0.108945 | 0.5      | 0.891055 | 0.988784 | 0.998875 | 0.999887 |
| 60000           | 0.000103 | 0.001035 | 0.010338 | 0.102501 | 0.5      | 0.897499 | 0.989662 | 0.998965 | 0.999897 |
| 100000          | 0.000101 | 0.001013 | 0.010127 | 0.100943 | 0.5      | 0.899057 | 0.989873 | 0.998987 | 0.999899 |
| 300000          | 0.0001   | 0.001002 | 0.010015 | 0.10011  | 0.5      | 0.89989  | 0.989985 | 0.998998 | 0.9999   |
| 600000          | 0.0001   | 0.001    | 0.010004 | 0.100028 | 0.5      | 0.899972 | 0.989996 | 0.999    | 0.9999   |
| 1000000         | 0.0001   | 0.001    | 0.010001 | 0.10001  | 0.5      | 0.89999  | 0.989999 | 0.999    | 0.9999   |
| k1,blue         | 0.000338 | 0.000338 | 0.000338 | 0.000338 | 0.000338 | 0.000338 | 0.000338 | 0.000338 | 0.000338 |
| k-1,blue        | 58104.76 | 58104.76 | 58104.76 | 58104.76 | 58104.76 | 58104.76 | 58104.76 | 58104.76 | 58104.76 |
| k2,green        | 58104.76 | 58104.76 | 58104.76 | 58104.76 | 58104.76 | 58104.76 | 58104.76 | 58104.76 | 58104.76 |
| k-2,green       | 0.000338 | 0.000338 | 0.000338 | 0.000338 | 0.000338 | 0.000338 | 0.000338 | 0.000338 | 0.000338 |

**Table S5-D.** Simulation results of the time-averaged surface coverage of C\* at temperatures of 153 K with varying duty cycle changes in surface coverage of C\* with increasing applied frequency. ( $\alpha = 0.5$ ,  $\beta = 0.375$  eV,  $\gamma_{D/C} = 2.0$ ,  $\delta_{C-D} = 0.25$ ,  $\Delta BE_C = 0.5$  eV) Lines in Figure 9b.

| Duty Cycle      | 0.0001  | 0.001     | 0.01      | 0.05      | 0.1       | 0.5 | 0.9      | 0.99     | 0.999    | 0.9999   |
|-----------------|---------|-----------|-----------|-----------|-----------|-----|----------|----------|----------|----------|
| Frequency (1/s) | 273     | 273       | 273       | 273       | 273       | 273 | 273      | 273      | 273      | 273      |
| 0.01            | 0.49998 | 0.4999998 | 0.5       | 0.5       | 0.5       | 0.5 | 0.5      | 0.5      | 0.5      | 0.500023 |
| 0.02            | 0.49991 | 0.4999991 | 0.5       | 0.5       | 0.5       | 0.5 | 0.5      | 0.5      | 0.500001 | 0.500092 |
| 0.03            | 0.4998  | 0.4999979 | 0.5       | 0.5       | 0.5       | 0.5 | 0.5      | 0.5      | 0.500002 | 0.500205 |
| 0.04            | 0.49964 | 0.4999962 | 0.5       | 0.5       | 0.5       | 0.5 | 0.5      | 0.5      | 0.500004 | 0.500359 |
| 0.05            | 0.49945 | 0.4999941 | 0.4999999 | 0.5       | 0.5       | 0.5 | 0.5      | 0.5      | 0.500006 | 0.500554 |
| 0.06            | 0.49921 | 0.4999916 | 0.4999999 | 0.5       | 0.5       | 0.5 | 0.5      | 0.5      | 0.500008 | 0.500787 |
| 0.07            | 0.49894 | 0.4999885 | 0.4999999 | 0.5       | 0.5       | 0.5 | 0.5      | 0.5      | 0.500011 | 0.501057 |
| 0.08            | 0.49864 | 0.499985  | 0.4999999 | 0.5       | 0.5       | 0.5 | 0.5      | 0.5      | 0.500015 | 0.501362 |
| 0.09            | 0.4983  | 0.4999811 | 0.4999998 | 0.5       | 0.5       | 0.5 | 0.5      | 0.5      | 0.500019 | 0.501702 |
| 0.1             | 0.49793 | 0.4999767 | 0.4999998 | 0.5       | 0.5       | 0.5 | 0.5      | 0.5      | 0.500023 | 0.502074 |
| 0.2             | 0.49268 | 0.499908  | 0.4999991 | 0.5       | 0.5       | 0.5 | 0.5      | 0.500001 | 0.500092 | 0.507321 |
| 0.3             | 0.48535 | 0.4997957 | 0.4999979 | 0.5       | 0.5       | 0.5 | 0.5      | 0.500002 | 0.500204 | 0.514647 |
| 0.4             | 0.4767  | 0.4996416 | 0.4999963 | 0.5       | 0.5       | 0.5 | 0.5      | 0.500004 | 0.500358 | 0.523304 |
| 0.5             | 0.46722 | 0.4994475 | 0.4999942 | 0.5       | 0.5       | 0.5 | 0.5      | 0.500006 | 0.500553 | 0.532778 |
| 0.6             | 0.45729 | 0.4992149 | 0.4999917 | 0.5       | 0.5       | 0.5 | 0.5      | 0.500008 | 0.500785 | 0.542714 |
| 0.7             | 0.44714 | 0.4989453 | 0.4999887 | 0.5       | 0.5       | 0.5 | 0.5      | 0.500011 | 0.501055 | 0.552862 |
| 0.8             | 0.43695 | 0.4986404 | 0.4999853 | 0.4999999 | 0.5       | 0.5 | 0.5      | 0.500015 | 0.50136  | 0.56305  |
| 0.9             | 0.42684 | 0.4983015 | 0.4999814 | 0.4999999 | 0.5       | 0.5 | 0.5      | 0.500019 | 0.501699 | 0.573159 |
| 1               | 0.4169  | 0.49793   | 0.4999771 | 0.4999999 | 0.5       | 0.5 | 0.5      | 0.500023 | 0.50207  | 0.583104 |
| 2               | 0.33226 | 0.4926917 | 0.4999096 | 0.499997  | 0.4999999 | 0.5 | 0.500001 | 0.50009  | 0.507308 | 0.667744 |
| 3               | 0.27307 | 0.4853793 | 0.4997994 | 0.499992  | 0.4999998 | 0.5 | 0.500002 | 0.500201 | 0.514621 | 0.726931 |
| 4               | 0.23097 | 0.4767379 | 0.4996481 | 0.499987  | 0.499997  | 0.5 | 0.500003 | 0.500352 | 0.523262 | 0.769025 |
| 5               | 0.19984 | 0.4672806 | 0.4994575 | 0.499979  | 0.499995  | 0.5 | 0.500005 | 0.500543 | 0.532719 | 0.800159 |
| 6               | 0.17598 | 0.457363  | 0.499229  | 0.49997   | 0.499993  | 0.5 | 0.500007 | 0.500771 | 0.542637 | 0.824017 |
| 7               | 0.15716 | 0.447233  | 0.4989644 | 0.499959  | 0.499991  | 0.5 | 0.500009 | 0.501036 | 0.552767 | 0.842844 |
| 8               | 0.14194 | 0.4370631 | 0.4986649 | 0.499947  | 0.499988  | 0.5 | 0.500012 | 0.501335 | 0.562937 | 0.858062 |
| 9               | 0.12939 | 0.4269732 | 0.4983321 | 0.499933  | 0.499985  | 0.5 | 0.500015 | 0.501668 | 0.573027 | 0.870611 |
| 10              | 0.11887 | 0.4170454 | 0.4979673 | 0.499917  | 0.499981  | 0.5 | 0.500019 | 0.502033 | 0.582955 | 0.88113  |
| 20              | 0.06551 | 0.3325584 | 0.4928235 | 0.499677  | 0.499926  | 0.5 | 0.500074 | 0.507176 | 0.667442 | 0.934493 |
| 30              | 0.04521 | 0.2734772 | 0.485643  | 0.499292  | 0.499836  | 0.5 | 0.500164 | 0.514357 | 0.726523 | 0.954791 |
| 40              | 0.03452 | 0.2314592 | 0.4771575 | 0.498774  | 0.499713  | 0.5 | 0.500287 | 0.522843 | 0.768541 | 0.965478 |
| 50              | 0.02793 | 0.2003816 | 0.4678707 | 0.498133  | 0.499557  | 0.5 | 0.500443 | 0.532129 | 0.799618 | 0.972072 |
| 60              | 0.02345 | 0.1765663 | 0.458132  | 0.49738   | 0.499371  | 0.5 | 0.500629 | 0.541868 | 0.823434 | 0.976546 |
| 70              | 0.02022 | 0.1577732 | 0.4481847 | 0.496523  | 0.499155  | 0.5 | 0.500845 | 0.551815 | 0.842227 | 0.979781 |
| 80              | 0.01777 | 0.1425822 | 0.4381983 | 0.49557   | 0.49891   | 0.5 | 0.50109  | 0.561802 | 0.857418 | 0.982229 |
| 90              | 0.01585 | 0.1300566 | 0.4282903 | 0.49453   | 0.498638  | 0.5 | 0.501362 | 0.57171  | 0.869943 | 0.984145 |

  

| Duty Cycle      | 0.0001   | 0.001    | 0.01     | 0.05     | 0.1      | 0.5 | 0.9      | 0.99     | 0.999    | 0.9999   |
|-----------------|----------|----------|----------|----------|----------|-----|----------|----------|----------|----------|
| Frequency (1/s) | 273      | 273      | 273      | 273      | 273      | 273 | 273      | 273      | 273      | 273      |
| 100             | 0.014313 | 0.119556 | 0.418542 | 0.493409 | 0.498341 | 0.5 | 0.501659 | 0.581458 | 0.880444 | 0.985687 |
| 200             | 0.007283 | 0.06629  | 0.335578 | 0.479022 | 0.494142 | 0.5 | 0.505858 | 0.664422 | 0.93371  | 0.992717 |
| 300             | 0.004906 | 0.046028 | 0.277563 | 0.46155  | 0.48828  | 0.5 | 0.51172  | 0.722437 | 0.953972 | 0.995094 |
| 400             | 0.003711 | 0.03536  | 0.236303 | 0.443243 | 0.481353 | 0.5 | 0.518647 | 0.763697 | 0.96464  | 0.996289 |
| 500             | 0.002992 | 0.028778 | 0.205786 | 0.425191 | 0.473772 | 0.5 | 0.526228 | 0.794214 | 0.971222 | 0.997008 |
| 600             | 0.002512 | 0.024312 | 0.1824   | 0.407907 | 0.465822 | 0.5 | 0.534178 | 0.8176   | 0.975688 | 0.997488 |
| 700             | 0.002168 | 0.021083 | 0.163946 | 0.391612 | 0.457702 | 0.5 | 0.542298 | 0.836054 | 0.978917 | 0.997832 |
| 800             | 0.00191  | 0.01864  | 0.149029 | 0.376375 | 0.44955  | 0.5 | 0.55045  | 0.850971 | 0.98136  | 0.99809  |
| 900             | 0.00171  | 0.016726 | 0.136729 | 0.362187 | 0.441461 | 0.5 | 0.558539 | 0.863271 | 0.983274 | 0.99829  |
| 1000            | 0.001549 | 0.015187 | 0.126418 | 0.349001 | 0.433503 | 0.5 | 0.566497 | 0.873582 | 0.984813 | 0.998451 |
| 2000            | 0.000825 | 0.00817  | 0.074112 | 0.257829 | 0.365778 | 0.5 | 0.634222 | 0.925888 | 0.99183  | 0.999175 |
| 3000            | 0.000584 | 0.005798 | 0.054216 | 0.208326 | 0.318419 | 0.5 | 0.681581 | 0.945784 | 0.994202 | 0.999416 |
| 4000            | 0.000463 | 0.004605 | 0.04374  | 0.177679 | 0.284737 | 0.5 | 0.715263 | 0.95626  | 0.995395 | 0.999537 |
| 5000            | 0.00039  | 0.003887 | 0.037277 | 0.156914 | 0.259825 | 0.5 | 0.740175 | 0.962723 | 0.996113 | 0.99961  |
| 6000            | 0.000342 | 0.003407 | 0.032891 | 0.141935 | 0.240735 | 0.5 | 0.759265 | 0.967109 | 0.996593 | 0.999658 |
| 7000            | 0.000307 | 0.003065 | 0.029721 | 0.130628 | 0.22567  | 0.5 | 0.77433  | 0.970279 | 0.996935 | 0.999693 |
| 8000            | 0.000281 | 0.002807 | 0.027321 | 0.121792 | 0.213493 | 0.5 | 0.786507 | 0.972679 | 0.997193 | 0.999719 |
| 9000            | 0.000261 | 0.002607 | 0.025443 | 0.114698 | 0.203452 | 0.5 | 0.796548 | 0.974557 | 0.997393 | 0.999739 |
| 10000           | 0.000245 | 0.002447 | 0.023931 | 0.108878 | 0.195035 | 0.5 | 0.804965 | 0.976069 | 0.997553 | 0.999755 |
| 20000           | 0.000173 | 0.001724 | 0.017041 | 0.080986 | 0.152336 | 0.5 | 0.847664 | 0.982959 | 0.998276 | 0.999827 |
| 30000           | 0.000148 | 0.001483 | 0.014711 | 0.071023 | 0.136094 | 0.5 | 0.863906 | 0.985289 | 0.998517 | 0.999852 |
| 40000           | 0.000136 | 0.001362 | 0.01354  | 0.065907 | 0.127543 | 0.5 | 0.872457 | 0.98646  | 0.998638 | 0.999864 |
| 50000           | 0.000129 | 0.00129  | 0.012835 | 0.062794 | 0.122267 | 0.5 | 0.877733 | 0.987165 | 0.99871  | 0.999871 |
| 60000           | 0.000124 | 0.001242 | 0.012364 | 0.0607   | 0.118687 | 0.5 | 0.881313 | 0.987636 | 0.998758 | 0.999876 |
| 70000           | 0.000121 | 0.001207 | 0.012027 | 0.059195 | 0.116099 | 0.5 | 0.883901 | 0.987973 | 0.998793 | 0.999879 |
| 80000           | 0.000118 | 0.001181 | 0.011775 | 0.058061 | 0.11414  | 0.5 | 0.88586  | 0.988225 | 0.998819 | 0.999882 |
| 90000           | 0.000116 | 0.001161 | 0.011578 | 0.057176 | 0.112606 | 0.5 | 0.887394 | 0.988422 | 0.998839 | 0.999884 |
| 100000          | 0.000115 | 0.001145 | 0.01142  | 0.056466 | 0.111373 | 0.5 | 0.888627 | 0.98858  | 0.998855 | 0.999885 |
| 200000          | 0.000107 | 0.001072 | 0.010711 | 0.053251 | 0.105748 | 0.5 | 0.894252 | 0.989289 | 0.998928 | 0.999893 |
| 300000          | 0.000105 | 0.001048 | 0.010474 | 0.052171 | 0.103846 | 0.5 | 0.896154 | 0.989526 | 0.998952 | 0.999895 |
| 400000          | 0.000104 | 0.001036 | 0.010356 | 0.05163  | 0.102889 | 0.5 | 0.897111 | 0.989644 | 0.998964 | 0.999896 |
| 500000          | 0.000103 | 0.001029 | 0.010285 | 0.051305 | 0.102314 | 0.5 | 0.897686 | 0.989715 | 0.998971 | 0.999897 |
| 600000          | 0.000102 | 0.001024 | 0.010237 | 0.051087 | 0.10193  | 0.5 | 0.89807  | 0.989763 | 0.998976 | 0.999898 |
| 700000          | 0.000102 | 0.001021 | 0.010203 | 0.050932 | 0.101655 | 0.5 | 0.898345 | 0.989797 | 0.998979 | 0.999898 |
| 800000          | 0.000102 | 0.001018 | 0.010178 | 0.050816 | 0.101449 | 0.5 | 0.898551 | 0.989822 | 0.998982 | 0.999898 |
| 900000          | 0.000102 | 0.001016 | 0.010158 | 0.050725 | 0.101288 | 0.5 | 0.898712 | 0.989842 | 0.998984 | 0.999898 |
| 1000000         | 0.000101 | 0.001015 | 0.010142 | 0.050653 | 0.10116  | 0.5 | 0.89884  | 0.989858 | 0.998985 | 0.999899 |

**Table S6-A.** Cutoff frequencies of three catalytic ratchets depicted in Figure 11d.

| Temperature (K) | 1/T*1000 | fc,1 (Hz) | fc,2 (Hz) | fc,3 (Hz) |
|-----------------|----------|-----------|-----------|-----------|
| 243             | 4.12     | 15        | 5         | 0.04      |
| 253             | 3.95     | 42        | 15        | 0.14      |
| 263             | 3.80     | 108       | 41        | 0.44      |
| 273             | 3.66     | 262       | 103       | 1.29      |
| 283             | 3.53     | 593       | 242       | 3.52      |
| 293             | 3.41     | 1272      | 535       | 9.00      |
| 303             | 3.30     | 2593      | 1122      | 22        |
| 313             | 3.19     | 5052      | 2245      | 49        |
| 323             | 3.10     | 9444      | 4303      | 106       |
| 333             | 3.00     | 17004     | 7933      | 218       |
| 343             | 2.92     | 29583     | 14112     | 431       |
| 353             | 2.83     | 49879     | 24298     | 819       |
| 363             | 2.75     | 81713     | 40602     | 1502      |
| 373             | 2.68     | 130367    | 66005     | 2667      |
| 383             | 2.61     | 202980    | 104611    | 4597      |
| 393             | 2.54     | 308996    | 161958    | 7706      |
| 403             | 2.48     | 460676    | 245361    | 12590     |
| 413             | 2.42     | 673657    | 364312    | 20087     |
| 423             | 2.36     | 967562    | 530915    | 31349     |
| 433             | 2.31     | 1366646   | 760365    | 47930     |
| 443             | 2.26     | 1900475   | 1071460   | 71888     |
| 453             | 2.21     | 2604628   | 1487146   | 105909    |
| 463             | 2.16     | 3521408   | 2035078   | 153442    |
| 473             | 2.11     | 4700554   | 2748200   | 218849    |
| 483             | 2.07     | 6199946   | 3665332   | 307583    |
| 493             | 2.03     | 8086283   | 4831752   | 426365    |
| 503             | 1.99     | 10435734  | 6299774   | 583395    |

**Table S6-B.** Dynamic turnover frequency (Fig. 11e) and surface coverage (Fig. 11g) at 303 K.

| T, K   | BEa [eV] | $\Delta$ BEa [eV] | f [1/s]  | DC [%] | qdot [L/s] | Ca [%]   | theta_*  | theta_A* | theta_B* | theta_C* | theta_D* | A(g) [-] | D(g) [-] | r1 [1/s] | r2 [1/s] | r3 [1/s] | r4 [1/s] | r5 [1/s] | TOF [1/s] |          |
|--------|----------|-------------------|----------|--------|------------|----------|----------|----------|----------|----------|----------|----------|----------|----------|----------|----------|----------|----------|-----------|----------|
| 303.15 | 2.5      | -1.8              | 1.00E-06 | 50     | 1          | 0.01     | 4.64E-07 | 0.5      | 7.65E-08 | 0.5      | 1.26E-11 | 0.9999   | 0.0001   | 0.00017  | 0.00017  | 0.00017  | 0.00017  | 0.00017  | 0.00017   | 0.00017  |
| 303.15 | 2.5      | -1.8              | 1.00E-05 | 50     | 1          | 0.01     | 4.64E-07 | 0.5      | 7.89E-08 | 0.5      | 1.27E-11 | 0.9999   | 1.00E-04 | 0.000179 | 0.000179 | 0.000179 | 0.000179 | 0.000179 | 0.000179  | 0.000179 |
| 303.15 | 2.5      | -1.8              | 1.00E-04 | 50     | 1          | 0.01     | 4.64E-07 | 0.5      | 1.03E-07 | 0.5      | 1.31E-11 | 0.9999   | 0.0001   | 0.000269 | 0.000269 | 0.000269 | 0.000269 | 0.000269 | 0.000269  | 0.000269 |
| 303.15 | 2.5      | -1.8              | 0.001    | 50.00  | 1          | 9.99E-03 | 4.64E-07 | 0.5      | 3.42E-07 | 0.5      | 1.51E-11 | 0.9999   | 9.99E-05 | 0.001169 | 0.001169 | 0.001169 | 0.001169 | 0.001169 | 0.001169  | 0.001169 |
| 303.15 | 2.5      | -1.8              | 0.01     | 50.00  | 1          | 9.99E-03 | 4.64E-07 | 0.5      | 2.73E-06 | 0.5      | 3.25E-11 | 0.9999   | 9.99E-05 | 0.01017  | 0.01017  | 0.01017  | 0.01017  | 0.01017  | 0.01017   | 0.01017  |
| 303.15 | 2.5      | -1.8              | 0.1      | 50.00  | 1          | 1.00E-02 | 4.68E-07 | 0.5      | 2.66E-05 | 0.5      | 2.05E-10 | 0.9999   | 0.0001   | 0.1002   | 0.1002   | 0.1002   | 0.1002   | 0.1002   | 0.1002    | 0.1002   |
| 303.15 | 2.5      | -1.8              | 1        | 50.00  | 1          | 1.00E-02 | 5.04E-07 | 0.5001   | 2.66E-04 | 0.4996   | 1.93E-09 | 0.9999   | 0.0001   | 1        | 1        | 1        | 1        | 1        | 1         | 1        |
| 303.15 | 2.5      | -1.8              | 10       | 50.00  | 1          | 1.00E-02 | 8.67E-07 | 0.5009   | 2.66E-03 | 0.4964   | 1.92E-08 | 0.9999   | 0.0001   | 10       | 10       | 10       | 10       | 10       | 10        | 10       |
| 303.15 | 2.5      | -1.8              | 50       | 50.00  | 1          | 1.00E-02 | 2.48E-06 | 0.5047   | 1.33E-02 | 0.482    | 9.59E-08 | 0.9999   | 0.0001   | 50       | 50       | 50       | 50       | 50       | 50        | 50       |
| 303.15 | 2.5      | -1.8              | 100      | 50.00  | 1          | 1.00E-02 | 4.50E-06 | 0.5094   | 2.66E-02 | 0.464    | 1.92E-07 | 0.9999   | 0.0001   | 100      | 100      | 100      | 100      | 100      | 100       | 100      |
| 303.15 | 2.5      | -1.8              | 500      | 50.00  | 1          | 1.00E-02 | 2.06E-05 | 0.5472   | 1.27E-01 | 0.3254   | 9.57E-07 | 0.9999   | 1.00E-04 | 499.9    | 499.9    | 499.9    | 499.9    | 499.9    | 499.9     | 499.9    |
| 303.15 | 2.5      | -1.8              | 1000     | 50.00  | 1          | 1.00E-02 | 4.02E-05 | 0.5932   | 1.97E-01 | 0.2099   | 1.89E-06 | 0.9999   | 0.0001   | 987.1    | 987.1    | 987.1    | 987.1    | 987.1    | 987.1     | 987.1    |
| 303.15 | 2.5      | -1.8              | 10000    | 50.00  | 1          | 1.00E-02 | 0.000138 | 0.822    | 8.58E-02 | 0.09208  | 6.53E-06 | 0.9999   | 1.00E-04 | 3412     | 3412     | 3412     | 3412     | 3412     | 3412      | 3412     |
| 303.15 | 2.5      | -1.8              | 100000   | 50     | 1          | 0.00998  | 0.000149 | 0.848    | 0.009228 | 0.1426   | 7.46E-06 | 0.9999   | 9.98E-05 | 3688     | 3688     | 3688     | 3688     | 3688     | 3688      | 3688     |
| 303.15 | 2.5      | -1.8              | 1.00E+06 | 50     | 1          | 0.00999  | 0.000149 | 0.8483   | 0.000923 | 0.1506   | 1.07E-05 | 0.9999   | 9.99E-05 | 3691     | 3691     | 3691     | 3691     | 3691     | 3691      | 3691     |
| 303.15 | 2.5      | -1.8              | 1.00E+07 | 50     | 1          | 0.994    | 0.00015  | 0.8483   | 9.23E-05 | 0.1514   | 1.40E-05 | 0.9901   | 0.007657 | 3690     | 3690     | 3691     | 3690     | 3690     | 3690      | 3690.2   |



**Table S6-C.** Static catalytic rates of the ratchet of Figure 11f at three temperatures

| Temp, K | BEa [eV] | qdot [L/s] | Ca [%]  | theta_*  | theta_A* | theta_B* | theta_C* | theta_D* | A(g) [-] | D(g) [-] | r1 [1/s] | r2 [1/s] | r3 [1/s] | r4 [1/s] | r5 [1/s] | TOF [1/s] |
|---------|----------|------------|---------|----------|----------|----------|----------|----------|----------|----------|----------|----------|----------|----------|----------|-----------|
| 263.15  | 2.5      | 3.34E-09   | 0.00999 | 5.60E-15 | 3.31E-10 | 1.35E-08 | 1        | 3.98E-13 | 0.9999   | 9.99E-05 | 1.21E-07 | 1.21E-07 | 1.21E-07 | 1.21E-07 | 1.21E-07 | 1.21E-07  |
| 263.15  | 2.3      | 4.70E-08   | 0.01    | 7.89E-14 | 4.23E-08 | 1.03E-09 | 1        | 2.89E-12 | 0.9999   | 0.0001   | 1.70E-06 | 1.70E-06 | 1.70E-06 | 1.70E-06 | 1.70E-06 | 1.70E-06  |
| 263.15  | 2.1      | 6.08E-06   | 0.103   | 1.11E-12 | 5.41E-06 | 1.21E-09 | 1        | 2.10E-11 | 0.999    | 9.84E-06 | 2.40E-05 | 2.40E-05 | 2.40E-05 | 2.40E-05 | 2.40E-05 | 2.40E-05  |
| 263.15  | 1.9      | 3.65E-05   | 0.0391  | 1.57E-11 | 6.91E-04 | 1.43E-09 | 0.9993   | 1.53E-10 | 0.9996   | 9.71E-05 | 3.38E-04 | 3.38E-04 | 3.38E-04 | 3.38E-04 | 3.38E-04 | 3.38E-04  |
| 263.15  | 1.7      | 0.000121   | 0.00997 | 2.03E-10 | 0.08385  | 1.60E-09 | 0.9162   | 1.02E-09 | 0.9999   | 9.97E-05 | 0.004371 | 0.004523 | 0.004523 | 0.004371 | 0.004371 | 4.43E-03  |
| 263.15  | 1.5      | 0.000151   | 0.00998 | 2.53E-10 | 0.9188   | 1.61E-10 | 0.0812   | 6.58E-10 | 0.9999   | 9.98E-05 | 0.005461 | 0.005465 | 0.005465 | 0.005461 | 0.005461 | 5.46E-03  |
| 263.15  | 1.3      | 1.92E-05   | 0.01    | 3.04E-11 | 0.9993   | 1.62E-12 | 0.000691 | 4.07E-11 | 0.9999   | 9.39E-05 | 0.000655 | 0.000655 | 0.000655 | 0.000655 | 0.000655 | 6.55E-04  |
| 263.15  | 1.1      | 2.06E-06   | 0.01    | 3.35E-12 | 1        | 1.50E-14 | 5.41E-06 | 2.32E-12 | 0.9999   | 9.66E-05 | 7.23E-05 | 7.23E-05 | 7.23E-05 | 7.23E-05 | 7.23E-05 | 7.23E-05  |
| 263.15  | 0.9      | 2.24E-07   | 0.00999 | 3.06E-12 | 1        | 1.38E-16 | 4.23E-08 | 1.32E-13 | 0.9999   | 9.80E-05 | 7.97E-06 | 7.97E-06 | 7.97E-06 | 7.97E-06 | 7.97E-06 | 7.97E-06  |
| 263.15  | 0.7      | 2.43E-08   | 0.0101  | 1.82E-08 | 1        | 1.27E-18 | 3.31E-10 | 3.42E-13 | 0.9999   | 9.98E-05 | 8.79E-07 | 8.79E-07 | 8.79E-07 | 8.79E-07 | 8.79E-07 | 8.79E-07  |
| 303.15  | 2.5      | 1.68E-06   | 0.0101  | 2.06E-12 | 5.91E-09 | 1.52E-07 | 1        | 1.72E-11 | 0.9999   | 8.45E-05 | 5.13E-05 | 5.13E-05 | 5.13E-05 | 5.13E-05 | 5.13E-05 | 5.13E-05  |
| 303.15  | 2.3      | 1.67E-05   | 0.0101  | 2.05E-11 | 3.98E-07 | 1.58E-08 | 1        | 9.63E-11 | 0.9999   | 8.42E-05 | 0.00051  | 0.00051  | 0.00051  | 0.00051  | 0.00051  | 5.10E-04  |
| 303.15  | 2.1      | 0.00014    | 0.01    | 2.04E-10 | 2.68E-05 | 1.82E-08 | 1        | 5.39E-10 | 0.9999   | 0.0001   | 0.005073 | 0.005073 | 0.005073 | 0.005073 | 0.005073 | 5.07E-03  |
| 303.15  | 1.9      | 0.00139    | 0.01    | 2.02E-09 | 0.001804 | 2.09E-08 | 0.9982   | 3.01E-09 | 0.9999   | 1.00E-04 | 0.05035  | 0.05035  | 0.05035  | 0.05035  | 0.05035  | 5.04E-02  |
| 303.15  | 1.7      | 0.0123     | 0.01    | 1.80E-08 | 0.1086   | 2.16E-08 | 0.8914   | 1.51E-08 | 0.9999   | 0.0001   | 0.447    | 0.447    | 0.447    | 0.447    | 0.447    | 4.47E-01  |
| 303.15  | 1.5      | 0.0149     | 0.01    | 2.18E-08 | 0.8914   | 3.03E-09 | 0.1086   | 1.03E-08 | 0.9999   | 0.0001   | 0.5413   | 0.5413   | 0.5413   | 0.5413   | 0.5413   | 5.41E-01  |
| 303.15  | 1.3      | 0.00247    | 0.00999 | 3.59E-09 | 0.9982   | 5.82E-11 | 0.001804 | 9.56E-10 | 0.9999   | 9.99E-05 | 0.0894   | 0.0894   | 0.0894   | 0.0894   | 0.0894   | 8.94E-02  |
| 303.15  | 1.1      | 0.000365   | 0.00999 | 5.31E-10 | 1        | 9.98E-13 | 2.68E-05 | 7.95E-11 | 0.9999   | 9.99E-05 | 0.01321  | 0.01321  | 0.01321  | 0.01321  | 0.01321  | 1.32E-02  |
| 303.15  | 0.9      | 5.38E-05   | 0.00999 | 5.17E-10 | 1        | 1.71E-14 | 3.98E-07 | 6.61E-12 | 0.9999   | 1.00E-04 | 0.001948 | 0.001948 | 0.001948 | 0.001948 | 0.001948 | 1.95E-03  |
| 303.15  | 0.7      | 7.92E-06   | 0.00167 | 9.27E-07 | 1        | 2.93E-16 | 5.90E-09 | 1.29E-12 | 1        | 1.67E-05 | 0.000287 | 0.000287 | 0.000287 | 0.000287 | 0.000287 | 2.87E-04  |
| 343.15  | 2.5      | 0.000147   | 0.00998 | 1.89E-10 | 5.39E-08 | 9.87E-07 | 1        | 3.09E-10 | 0.9999   | 9.98E-05 | 0.005317 | 0.005317 | 0.005317 | 0.005317 | 0.005317 | 5.32E-03  |
| 343.15  | 2.3      | 0.00112    | 0.00997 | 1.44E-09 | 2.22E-06 | 1.28E-07 | 1        | 1.42E-09 | 0.9999   | 9.97E-05 | 0.04045  | 0.04045  | 0.04045  | 0.04045  | 0.04045  | 4.05E-02  |
| 343.15  | 2.1      | 0.00849    | 0.01    | 1.09E-08 | 9.15E-05 | 1.45E-07 | 0.9999   | 6.49E-09 | 0.9999   | 0.0001   | 0.3077   | 0.3077   | 0.3077   | 0.3077   | 0.3077   | 3.08E-01  |
| 343.15  | 1.9      | 0.0644     | 0.00999 | 8.28E-08 | 0.00376  | 1.64E-07 | 0.9962   | 2.96E-08 | 0.9999   | 9.99E-05 | 2.332    | 2.332    | 2.332    | 2.332    | 2.332    | 2.33E+00  |
| 343.15  | 1.7      | 0.425      | 0.01    | 5.47E-07 | 0.1347   | 1.62E-07 | 0.8653   | 1.18E-07 | 0.9999   | 0.0001   | 15.41    | 15.41    | 15.41    | 15.41    | 15.41    | 1.54E+01  |
| 343.15  | 1.5      | 0.503      | 0.01    | 6.48E-07 | 0.8653   | 2.86E-08 | 0.1347   | 8.40E-08 | 0.9999   | 0.0001   | 18.24    | 18.24    | 18.24    | 18.24    | 18.24    | 1.82E+01  |
| 343.15  | 1.3      | 0.107      | 0.00999 | 1.38E-07 | 0.9962   | 9.05E-10 | 0.003758 | 1.07E-08 | 0.9999   | 9.99E-05 | 3.872    | 3.872    | 3.872    | 3.872    | 3.872    | 3.87E+00  |
| 343.15  | 1.1      | 0.0198     | 0.00999 | 2.55E-08 | 0.9999   | 2.50E-11 | 9.14E-05 | 1.20E-09 | 0.9999   | 9.99E-05 | 0.7165   | 0.7165   | 0.7165   | 0.7165   | 0.7165   | 7.17E-01  |
| 343.15  | 0.9      | 0.00365    | 0.00999 | 2.62E-08 | 1        | 6.88E-13 | 2.22E-06 | 1.33E-10 | 0.9999   | 9.99E-05 | 0.1321   | 0.1321   | 0.1321   | 0.1321   | 0.1321   | 1.32E-01  |
| 343.15  | 0.7      | 0.000672   | 0.01    | 1.86E-05 | 1        | 1.89E-14 | 5.37E-08 | 4.65E-11 | 0.9999   | 0.0001   | 0.02435  | 0.02435  | 0.02435  | 0.02435  | 0.02435  | 2.44E-02  |
